# Supplementary material
Source: PubMed Central journal article supplement (PMC7280468)
Supplement: NIHMS1588678-supplement-supplementary_material.pdf [file NIHMS1588678-supplement-supplementary_material.pdf]

## CONTENTS

| Section | Figure/Table Title                                                                                                                                                                                                                                                                                                                                         | Page Number |
|---------|------------------------------------------------------------------------------------------------------------------------------------------------------------------------------------------------------------------------------------------------------------------------------------------------------------------------------------------------------------|-------------|
| Methods |                                                                                                                                                                                                                                                                                                                                                            | 5-9         |
| Results |                                                                                                                                                                                                                                                                                                                                                            | 9-13        |
| Figures |                                                                                                                                                                                                                                                                                                                                                            |             |
|         | S1. Flow diagram of study selection                                                                                                                                                                                                                                                                                                                        | 14          |
|         | S2. Extracted mean per voxel probability of patient aberrant activation relative to control participants by disorder spectra.                                                                                                                                                                                                                              | 15          |
|         | S3. Aberrant activation by age group. Regions of transdiagnostic aberrant activation during emotional processing (i.e., pooled across disorder, patient hyper- and hypo-activation and across processing types), separately by age groups.                                                                                                                 | 16          |
|         | S4. Aberrant activation by medication status. Regions of transdiagnostic aberrant activation during emotional processing (i.e., pooled across disorder, patient hyper- and hypo-activation and processing types), separately by experiments with medicated and unmedicated samples.                                                                        | 17          |
|         | S5. Aberrant activation by performance/subjective ratings differences between patients and control participants.                                                                                                                                                                                                                                           | 18          |
|         | S6. Aberrant activation by modality. Regions of transdiagnostic aberrant activation during emotional processing (i.e., pooled across disorder, patient hyper- and hypo-activation and processing types), separately by modality (functional magnetic resonance imaging; positron emission tomography, and single-photon emission computerized tomography). | 19          |
|         | S7. Aberrant activation by valence. Regions of transdiagnostic aberrant activation during emotional processing (i.e., pooled across disorder, patient hyper- and hypo-activation, and processing types) separately by experiments of pleasant, unpleasant or combined pleasant/unpleasant processing.                                                      | 20          |

| Section                     | Figure/Table Title                                                                                                                                                                                                                                                                                                                           | Page Number |
|-----------------------------|----------------------------------------------------------------------------------------------------------------------------------------------------------------------------------------------------------------------------------------------------------------------------------------------------------------------------------------------|-------------|
| Figures<br>( <i>cont'</i> ) | S8. Aberrant activation by experimental task. Regions of transdiagnostic aberrant activation during emotional processing (i.e., pooled across disorder, patient hyper- and hypo-activation, and processing types) by experimental task.                                                                                                      | 21          |
|                             | S9. Aberrant activation by experimental stimuli. Regions of transdiagnostic aberrant activation during emotional processing (i.e., pooled across disorder, patient hyper- and hypo-activation and processing types) separately by stimuli contrasts that demonstrated convergence.                                                           | 22          |
|                             | S10. A. Conjunctions and B. Contrasts of transdiagnostic aberrant activation (i.e., pooled across disorder and patient hyper- and hypo-activation) for reactivity, regulation, and compound processing tasks                                                                                                                                 | 23          |
|                             | S11. Contrasts of transdiagnostic aberrant activation (i.e., pooled across disorder, patient hyper- and hypo-activation and tasks) for non-psychotic and psychotic disorder groups.                                                                                                                                                          | 24          |
|                             | S12. Contrasts of aberrant activation (i.e., pooled across patient hyper- and hypo-activation and tasks) by disorder spectra.                                                                                                                                                                                                                | 25          |
|                             | S13. Contrasts of aberrant activation (i.e., pooled across patient hyper- and hypo-activation and tasks) for specific disorder groups.                                                                                                                                                                                                       | 26          |
|                             | S14. Percent of experimental contrasts contributing to convergence across disorders in hyper- and hypo-activation ALE according to broad diagnostic grouping. ANX=anxiety spectrum disorders; UNI=unipolar depression spectrum disorders; BIP=bipolar spectrum disorders; SCZ=schizophrenia spectrum disorders; SUD=substance use disorders. | 27          |
|                             | S15. Regions of disruption across disorders during emotional processing separated by processing types and patient hyper- and hypo-activation.                                                                                                                                                                                                | 28          |

| Section                     | Figure/Table Title                                                                                                                                                                                                                                                                                                                                                                                                                                                                                                                                                           | Page Number |
|-----------------------------|------------------------------------------------------------------------------------------------------------------------------------------------------------------------------------------------------------------------------------------------------------------------------------------------------------------------------------------------------------------------------------------------------------------------------------------------------------------------------------------------------------------------------------------------------------------------------|-------------|
| Figures<br>( <i>cont'</i> ) | S16. A. Regions of transdiagnostic aberrant activation during emotional processing tasks (i.e., pooled across disorder and patient hyper- and hypo-activation) (RED) and the regions involved in intact cognitive emotion regulation as identified by Langner and colleagues (1). B. Conjunction between regions of transdiagnostic aberrant activation during emotional processing tasks (i.e., pooled across disorder and patient hyper- and hypo-activation) and the regions involved in intact cognitive emotion regulation as identified by Langner and colleagues (1). | 29          |
|                             | S17. A. Regions of transdiagnostic aberrant activation during compound emotional processing tasks (i.e., pooled across disorder and patient hyper- and hypo-activation) and the anterior salience network identified by Shirer and colleagues (2) and conjunction (B).                                                                                                                                                                                                                                                                                                       | 30          |
|                             | S18. Regions of disruption by diagnostic spectra, separated by patient hyper- and hypo-activation                                                                                                                                                                                                                                                                                                                                                                                                                                                                            | 31          |
|                             | S19. Extracted mean per voxel probability of patient hyper- and hypo-activation by disorder spectra.                                                                                                                                                                                                                                                                                                                                                                                                                                                                         | 32          |
|                             | S20. Regions of disruption by specific diagnosis, separated by patient hyper- and hypo-activation.                                                                                                                                                                                                                                                                                                                                                                                                                                                                           | 33          |
|                             | S21. A. Regions of transdiagnostic aberrant activation during emotional processing tasks (i.e., pooled across disorder and patient hyper-/hypo-activation). B. and the dorsomedial prefrontal regions parcellated by Eickhoff and colleagues (3).                                                                                                                                                                                                                                                                                                                            | 34          |
| Tables                      | S1. Experiments included in meta-analysis by diagnostic grouping, modality, domain and task.                                                                                                                                                                                                                                                                                                                                                                                                                                                                                 | 35-60       |
|                             | S2. Peak coordinates of clusters derived from Activation Likelihood Estimation (ALE) meta-analysis of transdiagnostic aberrant activation (i.e., pooled across disorders and patient hyper- and hypoactivation) during functional neuroimaging of emotional processing tasks.                                                                                                                                                                                                                                                                                                | 61          |
|                             | S3. Percent contribution to clusters of convergence for whole-pooled aberrant activation meta-analytic contrasts by experiment sample and design characteristics.                                                                                                                                                                                                                                                                                                                                                                                                            | 62-64       |

| Section                    | Figure/Table Title                                                                                                                                                                                                                                                           | Page Number |
|----------------------------|------------------------------------------------------------------------------------------------------------------------------------------------------------------------------------------------------------------------------------------------------------------------------|-------------|
| Tables<br>( <i>cont'</i> ) | S4. Peak coordinates of clusters derived from Activation Likelihood Estimation (ALE) meta-analysis of transdiagnostic pooled patient hyper- and hypoactivation (i.e., aberrant activation across disorders) during functional neuroimaging of different emotional processes. | 65          |
|                            | S5. Peak coordinates of clusters derived from ALE meta-analysis of pooled hyper- and hypo-activation during functional neuroimaging of emotional processing separately for psychotic and non-psychotic samples.                                                              | 66          |
|                            | S6. Peak coordinates of clusters derived from Activation Likelihood Estimation (ALE) meta-analysis of transdiagnostic (i.e., pooled across disorder) patient hyper- and hypoactivation during functional neuroimaging of emotional processing.                               | 67          |
|                            | S7. Percent contribution to clusters of convergence for patient hypo- and hyper-activation contrasts by experiment sample and design characteristics.                                                                                                                        | 68-70       |
|                            | S8. Peak coordinates of clusters derived from Activation Likelihood Estimation (ALE) meta-analysis of transdiagnostic (i.e., pooled across disorder) patient hyper- and hypoactivation during functional neuroimaging of emotional processing by task process                | 71          |
|                            | S9. Peak coordinates of clusters derived from Activation Likelihood Estimation (ALE) meta-analysis of hyper and hypoactivation during functional neuroimaging of emotional processing separately for psychotic and non-psychotic samples.                                    | 72          |
|                            | S10. Peak coordinates of clusters derived from Activation Likelihood Estimation (ALE) meta-analysis of patient hyper- and hypoactivation during functional neuroimaging of emotional processing by broad disorder grouping.                                                  | 73          |
| References                 |                                                                                                                                                                                                                                                                              | 74          |

## Supplementary Methods

**Search Terms.** The following search terms were used in Pubmed to identify potential articles: (schizophrenia OR schizoaffective OR psychosis OR depression OR dysthymia OR unipolar depression OR major depression OR bipolar disorder OR mania OR specific phobia OR social anxiety OR social phobia OR panic disorder OR agoraphobia OR OCD OR GAD OR PTSD OR acute stress disorder OR anxiety OR substance abuse OR substance dependence OR addiction OR substance use disorder) AND (emotion) AND (IAPS OR pictures OR faces OR words OR IADS OR sounds OR conditioning OR threat OR shock OR reward OR punishment OR mood induction OR symptom provocation OR script imagery OR imagery OR recall OR memory OR error OR delay discounting OR anticipation OR mood induction OR video OR emotion regulation) AND (PET OR fmri).

**Coordinate and Characteristics Extraction.** Peak coordinates and study/participant characteristics were extracted from each paper separately by a minimum of two doctoral-level researchers and one doctoral student with expertise in psychiatric neuroimaging (LM, BR, JH, DC, YJ, CC). In the case of discrepancies one to three additional doctoral-level coders re-entered those articles. Each discrepancy resulting from more than straightforward entry error was reviewed to establish consensus.

The following variable criteria for coding study characteristics were provided.

Pure Reactivity:

Y or N the paradigm indexes straightforward emotion provocation. For example, emotional faces with no task are pure reactivity. The emotional stroop is not pure reactivity.

More emotion than cognition:

This variable is for coding paradigms that may have a task simultaneous with the emotional processing task. Enter Y or N as to whether the design is weighted more toward emotion provocation as opposed to cognitive processing/load. For example, tasks of gender identification during slowly presented (i.e., multiple seconds) emotional faces are more prominently emotional than cognitive given the low cognitive demand. A 1-back n-back with IAPS would be weighted more emotional than cognitive. However, with increasing load please decide if a paradigm is weighted more toward capturing cognitive than emotional processing. Performance data can help with that decision. If performance is near ceiling, the cognitive task is merely ensuring attention to the affective foreground.

Cognition/Emotion Explanation:

Describe the extent to which cognitive load could alter emotion provocation effects. For example, a gender identification task with faces will have a modest effect on emotional modulation and minimally recruit cognitive control circuitry whereas a 2- or 3-back imposed on emotional faces would have a stronger regulatory effect on emotional modulation and result in greater recruitment of cognitive control circuitry.

## Type processing

Please code:

Reactivity

Regulation

Compound

Other

- Reactivity = passive reactivity (e.g., picture viewing; maintain condition of emotion regulation paradigm)
- Emotion Regulation = up or down/reappraisal regulation condition of emotion regulation paradigm
- Compound reactivity + cognitive task (emotional cues with concurrent cognitive task like n-back/ go/no-go)

## Regulation Direction

If a regulation study specify

**Activation Likelihood Estimation (ALE) Meta-analysis.** The revised ALE algorithm, implemented in MATLAB, was used to identify areas of convergence of reported coordinates for patient/control differences in activation during emotional processing tasks higher than expected under a random spatial association (4, 5). ALE models activation as 3-dimensional Gaussian probability distributions centered on the reported peak coordinate, capturing the spatial uncertainty associated with each focus. The probability distributions for all foci of a given experiment were aggregated as a “modeled activation map” (6). The union of all modeled activation maps then resulted in

voxelwise ALE scores, which were tested against an analytically derived null-distribution that reflects a random spatial association between experiments with a fixed within-experiment distribution of foci (6). Hereby, random-effects inference was applied, which assesses above-chance convergence between experiments. The observed ALE scores were tested against the expectation on the ALE scores under the null distribution of random spatial association across experiments. The resulting nonparametric p values were then thresholded at a cluster-level familywise-error-corrected threshold of  $p < .05$  (cluster-forming threshold at voxel-level  $P < .005$ ) and transformed into z scores for display.

To avoid results dominated by one or two individual experiments and to have sufficient power to detect moderately sized effects, ALE interpretations were limited to those contrasts with at least 17 experiments. This is based on work by Eickhoff and colleagues (7) who simulated more than 120,000 meta-analysis datasets using empirical parameters (i.e., number of subjects, number of reported foci, distribution of activation foci) derived from the BrainMap database. This was towards the aim of characterizing the behavior of ALE analyses, to derive first power estimates for neuroimaging meta-analyses, and to thus formulate recommendations for future ALE studies. They demonstrated that cluster-level family-wise error (FWE) correction represents the most appropriate method for statistical inference. In turn, using cluster-level FWE thresholding, 17 experiments ensure that on average the contribution of the most dominant experiments is less than 50% whereas the contribution of the two most dominant experiments is less than 80%. This enables sufficient power to detect moderate effects. Furthermore, informed by these findings, in a recent consensus paper



leaders in neuroimaging meta-analysis who utilize a range of software suites formally recommended that a meta-analysis should include at least 17 experiments (8).

## **Supplementary Results**

**Final Selected Experiment Set.** The final set of experiments submitted to meta-analysis consisted of 298 experiments from 254 articles (Figure S1; Table S1) for a total of 10,918 participants (5,427 patient and 5,491 control participants). The vast majority of experiments (n=283) utilized functional magnetic resonance imaging (fMRI) followed by 14 positron emission tomography experiments and one using single-photon emission computerized tomography. See Figure S5 for analyses limited to fMRI. Experiments were published between 1999 and May 2018.

For the small subset of articles that included multiple patient groups completing the same experimental paradigm (three papers included more than one patient group) each patient versus control comparison was included as a separate experiment. Articles with results of multiple tasks probing emotional processing in the same participants were included as separate experiments in the meta-analysis (i.e., 26 articles included two tasks; one article included three tasks; three articles included four tasks; one article included five tasks).

Experiments were selected to capture lifespan patterns and thus included participants ranging from childhood (youngest experiment group mean age=12.1 years) through older adulthood (oldest experiment group mean age=73.1 years). The majority of experiments represented adulthood (n=273; 18-50 years; participant mean age=44.40 years), followed by childhood/adolescence (n=21; <18 years; mean age=14.76 years) and very few with older adults (n=4; >50 years; mean age=60.27

years). See Figure S3 for analyses separately by age group. Furthermore, most experiments included medicated (n=174) versus unmedicated (n=119) patients while the information was lacking for 5 experiments. See Figure S4 for analyses by current medication status. Poorer behavioral performance and/or ratings of more intense emotional engagement on the scanner task by patients relative to control participants was reported in 158 experiments, no differences in 140 experiments, and not reported or assessed for 2 experiments. See Figure S5 for analyses by performance/ratings status. Baseline experiments of interventional studies (e.g., drug administration, treatment) otherwise meeting criteria were included.

The psychotic disorders category comprised experiments exclusively of schizophrenia (n=59). The more heterogeneous non-psychotic disorders category comprised 239 experiments of anxiety disorders (n=94; posttraumatic stress disorder (PTSD) n=28; obsessive compulsive disorder (OCD) n=20; social anxiety disorder n=17; specific phobia n=11; generalized anxiety disorder (GAD) n=10; panic disorder n=5; mixed anxiety disorders n=3), unipolar depressive disorders n=79, bipolar disorders n=47; and substance use disorders (mixed substance abuse and/or dependence disorders n=19: cocaine n=8; alcohol n=6; methamphetamine n=3; cannabis n=2). Across disorders, patient participants included those with first episode and chronic disorder manifestations, as well as interepisode expressions in the case of chronic bipolar and psychotic disorders (11/47 and 4/59 psychotic and bipolar disorder experiments respectively included interepisode patient samples). Reports of comorbidity were inconsistent across studies precluding quantification.

Included experiments also represented three broad types of emotional

processing: reactivity n=230, compound emotional/cognitive n=56; and regulate n=18. More specifically, tasks included an array of emotional processing tasks across multiple domains: picture viewing n=161, script reactivity/imagery n=20, stroop task n=15, conditioning n=12, and range of diverse tasks none of which each exceeded more than 1 to 11 studies. Experimental stimuli were predominantly faces (n=105) followed by scenes (n=89), words (n=28), scripts (n=20), shapes (n=18), sentences (n=6), heat (n=5), and a diverse range of stimuli each with less than 5 experiments each. Most experiments included medicated (n=174) as opposed to unmedicated patients (n=119) while information on medication was lacking for 5 experiments. Seventy-nine percent of all contrasts were of an emotional arousing condition relative to an “active” neutral condition whereas 16% of contrasts were in relation to baseline, and 5% were in relation to a fixation condition. Across all the 298 included experiments a total of 3,028 contrasts were extracted from the included papers. Of these, 2,099 or 69% represented unpleasant relative to neutral or baseline processing. Only 19% represented pleasant relative to neutral or baseline and 12% reported unpleasant and pleasant concurrently as an arousal contrast.

While the meta-analytic approach may impose limitations by the breadth of published literature, it also productively highlights a number of implied conceptual and methodological biases in psychiatric and cognitive neuroscience research. This was especially pronounced in examining lifespan effects. In the case of older adults, even with the very lenient threshold of categorizing all participants over 50 years as elderly, we could only identify four eligible experiments, i.e., less than 3% of the included set. With a global average life expectancy of 71 years and 79 years in the United States (WHO; [http://www.who.int/gho/mortality\\_burden\\_disease/life\\_tables/en/](http://www.who.int/gho/mortality_burden_disease/life_tables/en/)), there is a

dearth of neuroimaging data to guide understanding of emotional processing and psychopathology in aging samples. In the case of children and young adults less than 18 years, we identified 21 eligible experiments, less than 10% of the experiment set. In turn, 56% of the total experiments were samples with mean ages between 30 and 40 years. The under-representation of younger and older samples was even more pronounced in the current meta-analysis than in our prior transdiagnostic meta-analysis of cognitive control neurocircuit function (9).

Relatedly, anxiety spectrum disorders far exceeded other disorder classes, possibly reflective of the nosological prediction that this pathology is synonymous with defensive hyper-reactivity (APA, 2013). Unipolar depression was the next most represented disorder class, followed by schizophrenia. Substance use disorders were the least represented with only 19 included experiments. Despite the wealth of substance use disorder papers with craving and related emotional processing during fMRI, most studies did not report voxelwise, whole brain results and were thus excluded.

**Contribution Results to Aberrant Activation Analyses.** Consistent with the array of included experiments, overwhelmingly, experiments of adulthood (18-50 years) contributed the most to all clusters (i.e., 86% on average across clusters; 90% of all contrasts), relative to experiments of childhood/adolescence (<18 years) and older adulthood (>50 years). Experiments of childhood/adolescence showed convergence in occipital and occipito-temporal regions whereas experiments of adulthood showed strong convergence in limbic/paralimbic and prefrontal regions as observed in the ALE across the lifespan. No convergence was observed for older adulthood. Results from

medicated and unmedicated samples contributed similarly across clusters. Furthermore, similar findings were observed whether or not patients and controls differed on task-related behavioral performance or subjective ratings. Considering modality, fMRI experiments contributed more (92% on average) than PET experiments, with no contributions from SPECT experiments (Figure S6). Regarding task processes, reactivity tasks (80% on average across clusters; 78% of all contrasts) contributed far more than regulation and compound tasks. Unpleasant as opposed to pleasant or a combination of pleasant and unpleasant processing contributed most (72% on average; 69% of all contrasts). Furthermore, convergent clusters were predominantly represented by picture (i.e., faces and scenes) processing tasks (45% on average; 52% of all contrasts) with the next strongest contributions from script processing/imagery (7% on average; Figure S7). In terms of specific stimuli, experiments that utilized faces contributed most across clusters (45% on average; 37% of all contrasts), followed by scenes (26% on average; 30% of all contrasts), words (11% on average; 10% of all contrasts), and scripts (7% on average; 8% of all contrasts). Corresponding ALE results stratified by sample and design characteristics are provided in Figures S3-S9. Analyses of extracted mean per voxel probability of patient aberrant activation relative to control participants by disorder class (Figure S2) further underscored the broad distribution of disorders contributing to each of the clusters of convergence. More specifically, region of interest (ROI) analyses on extracted data from the six significant clusters, demonstrated similar probabilities of voxelwise activation from the modeled activation maps across disorder groupings (Kruskal-Wallis Test,  $H_s=7.86-0.56$ , ns (Figure S2)).

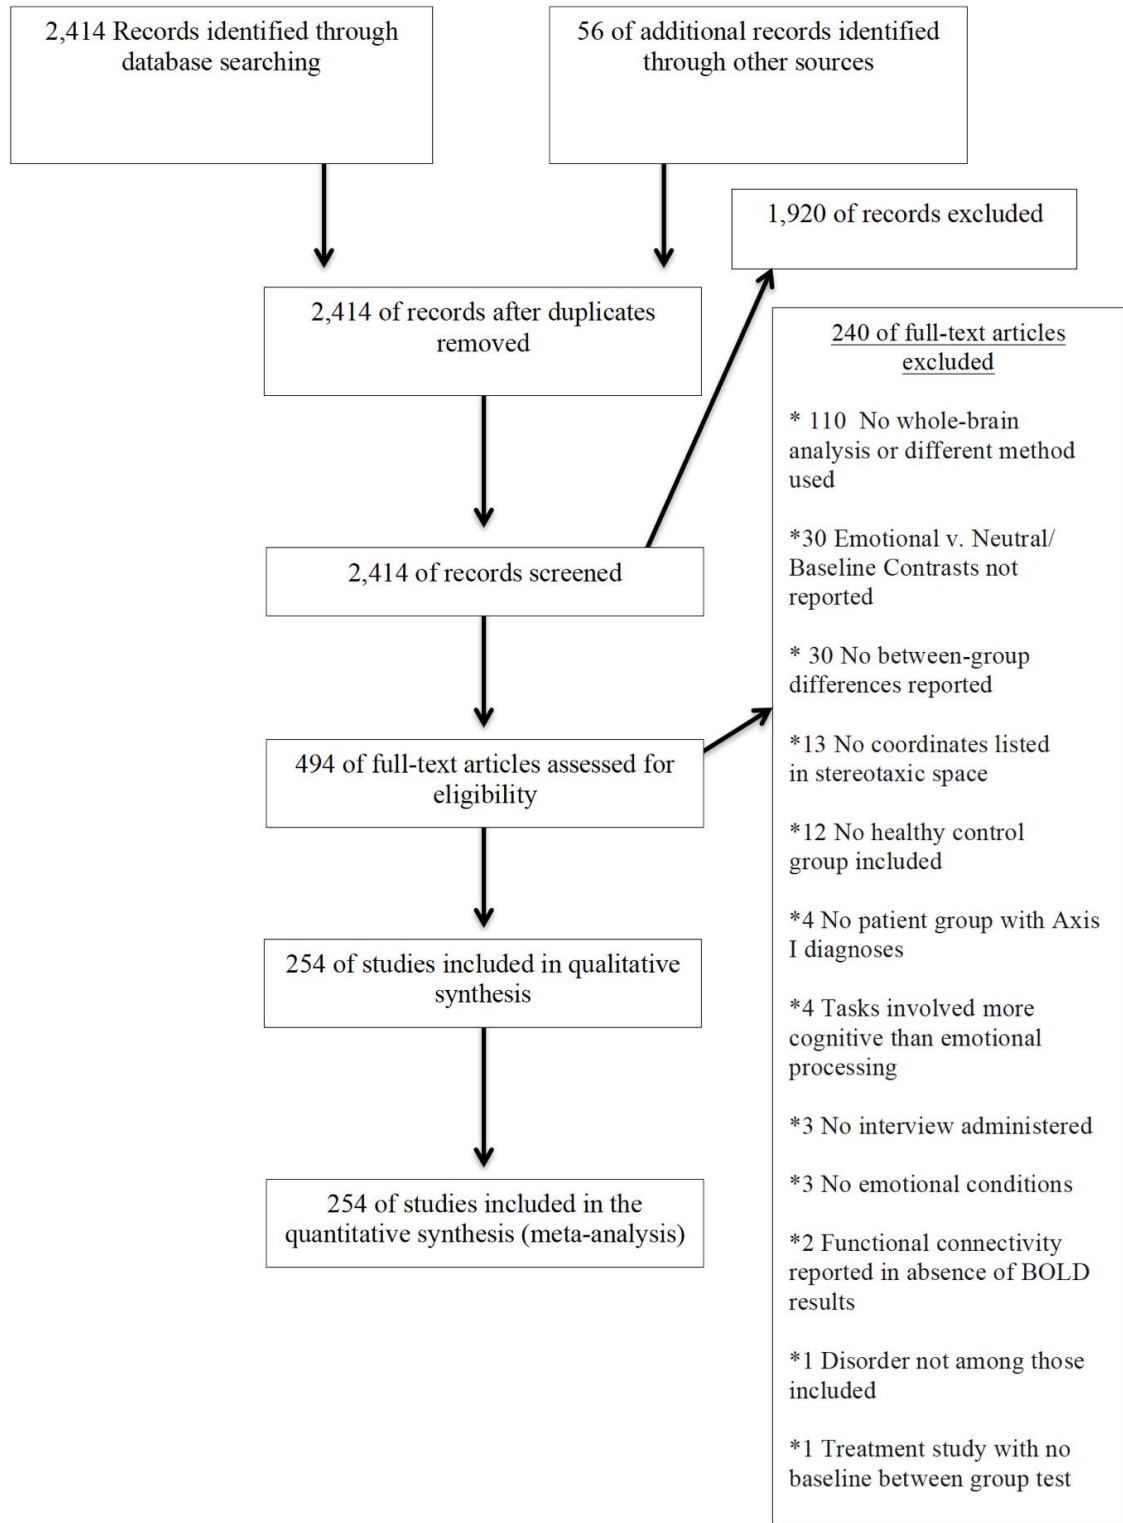

FIGURE S1. Flow diagram of paper selection

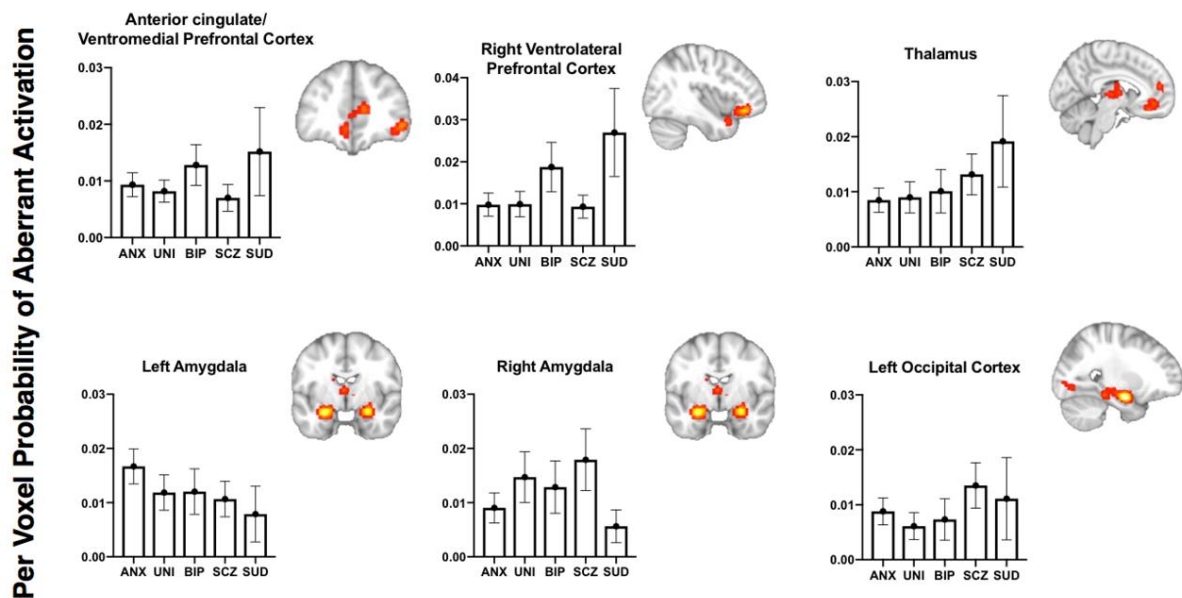

FIGURE S2. Extracted mean per voxel probability of patient aberrant activation (i.e., pooled across patient hyper- and hypo-activation and across processing types) relative to control participants by disorder class. ANX=anxiety spectrum disorders; UNI=unipolar depression spectrum disorders; BIP=bipolar spectrum disorders; SCZ=schizophrenia spectrum disorders; SUD=substance use disorders. Consistent with a transdiagnostic signature, a broad distribution of disorders contributed to each of the clusters of convergence. This was confirmed by follow up region of interest (ROI) analyses on extracted data from the six significant clusters, which demonstrated similar probabilities of voxelwise activation from the modeled activation maps across disorder groupings (Independent Samples Kruskal-Wallis Test,  $U_s=7.86-0.56$ , ns).

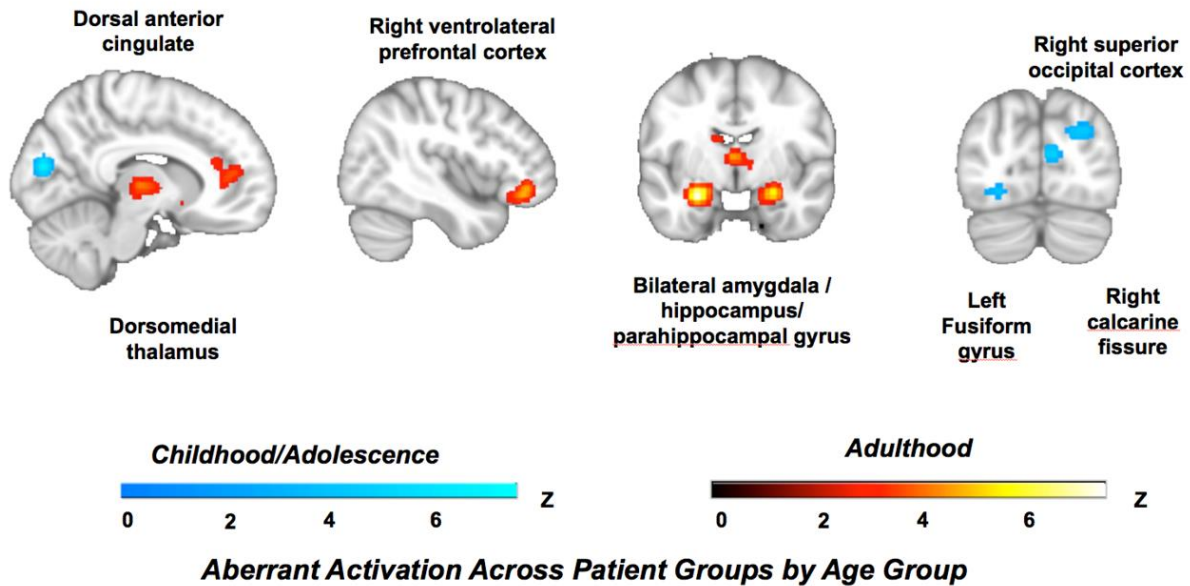

FIGURE S3. Aberrant Activation by Age Group. Regions of transdiagnostic aberrant activation during emotional processing (i.e., pooled across disorder, patient hyper- and hypo-activation and processing types), separately by age groups. The majority of experiments represented adulthood ( $n=273$ ; 18-50 years; participant mean age=44.40 years), followed by childhood/adolescence ( $n=21$ ; <18 years; mean age=14.76 years) and very few with older adults ( $n=4$ ; >50 years; mean age=60.27 years). Not surprisingly, the latter group did not show convergence. This was confirmed by follow up region of interest (ROI) analyses on extracted data from the significant clusters in the aberrant activation analyses (collapsing across hyper- and hypo-activation) as well as for those which separately converged for patient hyper- and hypo-activation. Across age groups, similar per voxel probability of activation was observed from the modeled activation maps by ROI (Independent Samples Kruskal-Wallis Tests,  $H=3.44-0.28$ , ns). Non-significant results should be interpreted with caution given the dramatically different experiment ns by age group.



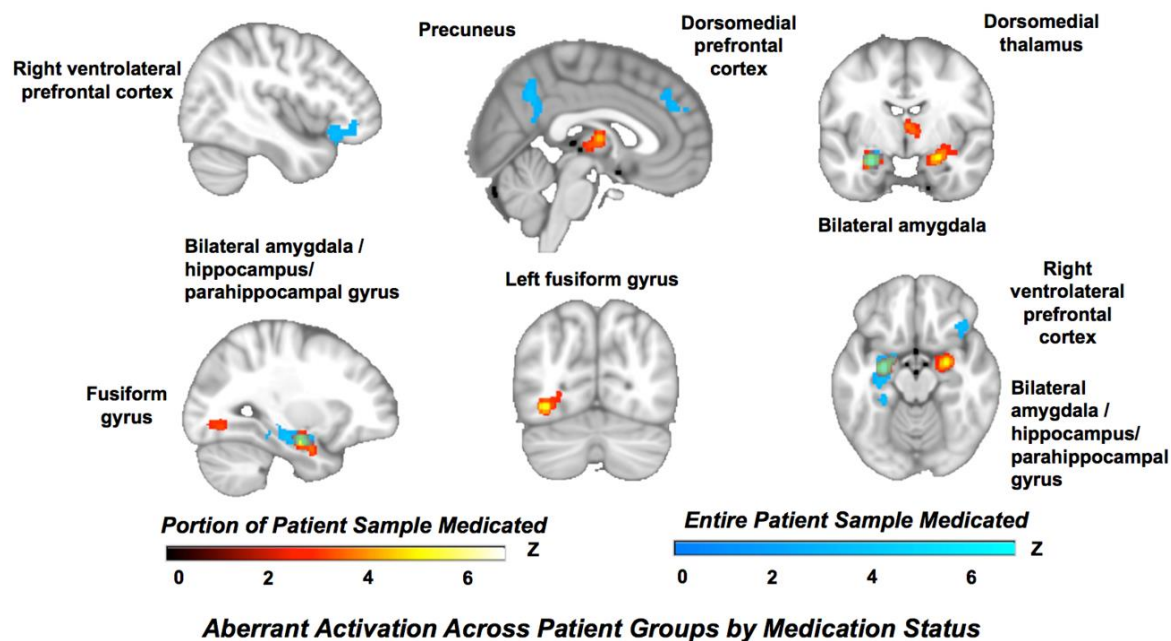

FIGURE S4. Aberrant Activation by Medication Status. Regions of transdiagnostic aberrant activation during emotional processing (i.e., pooled across disorder, patient hyper- and hypo-activation, and processing types), separately by experiments with medicated and unmedicated samples.

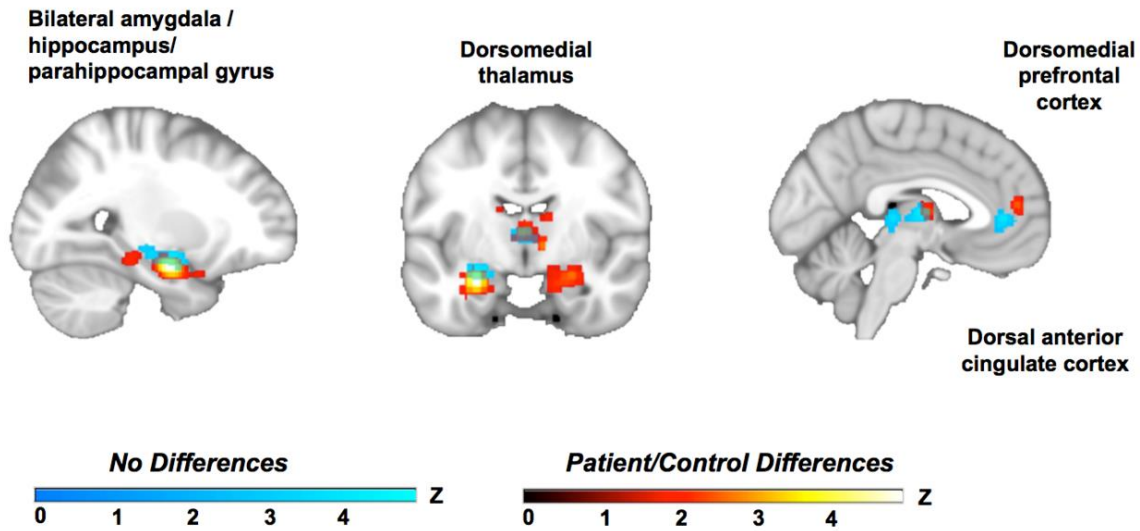

***Aberrant Activation Across Patient Groups by Behavioral Differences***

FIGURE S5. Aberrant activation by performance/subjective ratings differences between patients and control participants. Regions of transdiagnostic aberrant activation during emotional processing (i.e., pooled across disorder, patient hyper- and hypo-activation, and processing types), separately by experiments for which patients and controls differed on behavioral performance and/or intensity of subjective ratings. All experiments for which patients and controls differed represented worse behavioral performance and/or more intense subjective ratings of aversion among patient samples. Poorer behavioral performance and/or ratings of more intense emotional engagement on the scanner task by patients relative to control participants was reported in 158 experiments, no differences in 140 experiments, and not reported or assessed for 2 experiments.

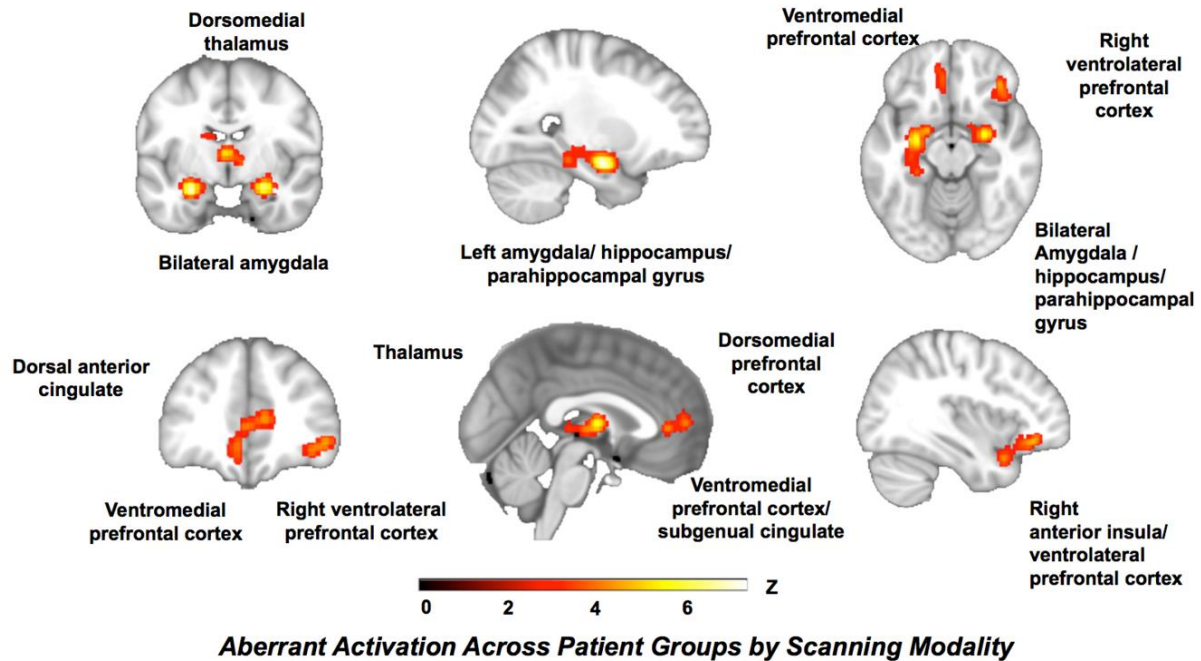

FIGURE S6. Aberrant activation by modality. Regions of transdiagnostic aberrant activation during emotional processing (i.e., pooled across, disorder, patient hyper- and hypo-activation, and processing types), separately by experiments assessed with utilized functional magnetic resonance imaging (fMRI; n=283), positron emission tomography (PET; n=14), and single-photon emission computerized tomography (SPECT; n=1). Only experiments with fMRI showed convergence.

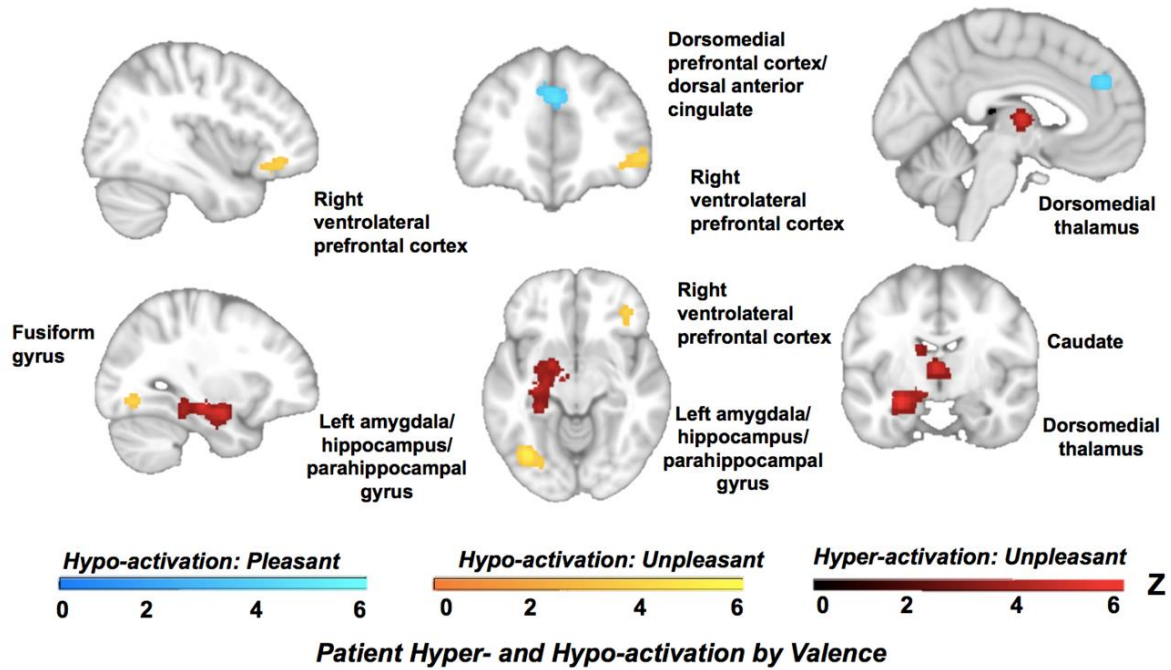

FIGURE S7. Aberrant activation by valence. Regions of transdiagnostic aberrant activation during emotional processing (i.e., pooled across disorder, patient hyper- and hypo-activation, and processing types), separately by experiments of pleasant, unpleasant or combined pleasant/unpleasant processing.

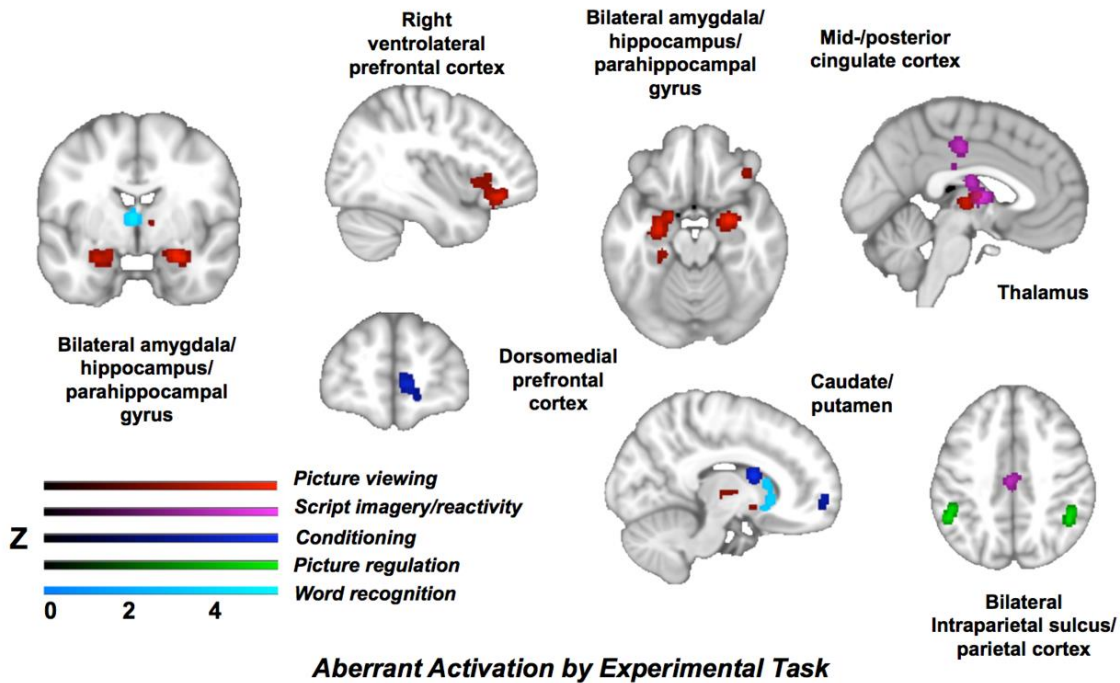

FIGURE S8. Aberrant activation by experimental task. Regions of transdiagnostic aberrant activation during emotional processing (i.e., pooled across disorder, patient hyper- and hypo-activation, and processing types) separately by experimental task contrasts that demonstrated convergence. Notably, while picture viewing (n=161) and script/reactivity/imagery (n=20), had sufficient contrasts to determine moderate effect sizes and avoid predominant contribution by a single study, conditioning (n=12), regulation of responses to pictures (n=11), and word recognition (n=6) did not and convergence should be interpreted with caution.

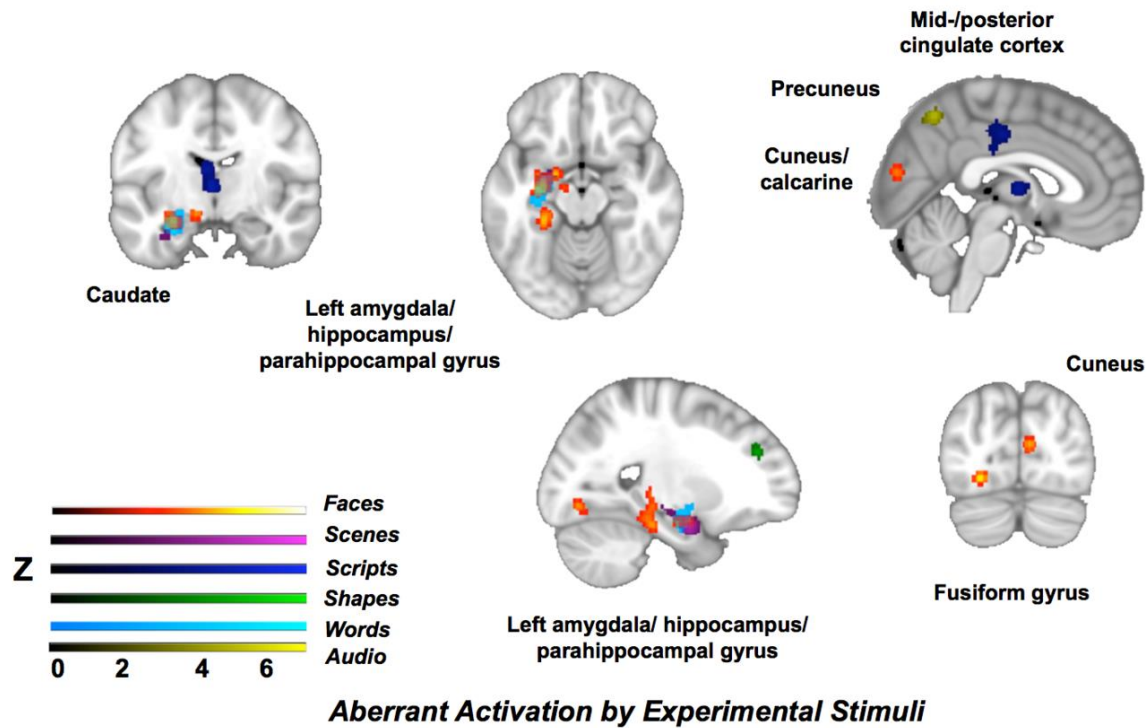

FIGURE S9. Aberrant activation by experimental stimuli. Regions of transdiagnostic aberrant activation during emotional processing (i.e., pooled across disorder, patient hyper- and hypo-activation, and processing types) separately by stimuli contrasts that demonstrated convergence. Experimental stimuli were predominantly faces (n=105) followed by scenes (n=89), words (n=28), scripts (n=20), shapes (n=18), sentences (n=6), heat (n=5), and a diverse range of stimuli each with less than 5 experiments each.



**Aberrant Activation Across Patient Groups by Process Type: Conjunctions**

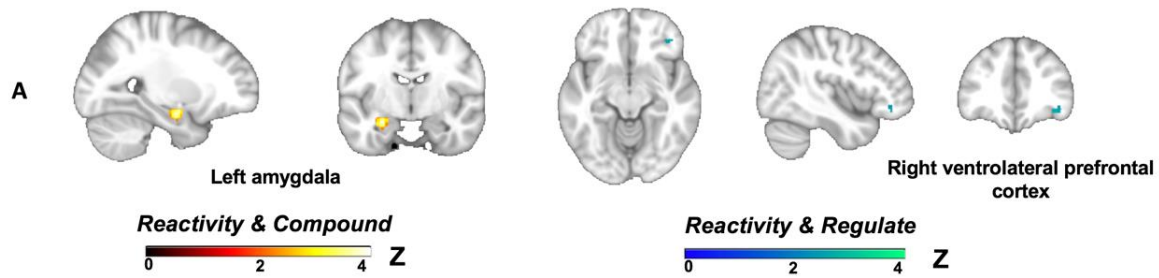

**Aberrant Activation Across Patient Groups by Process Type: Contrasts**

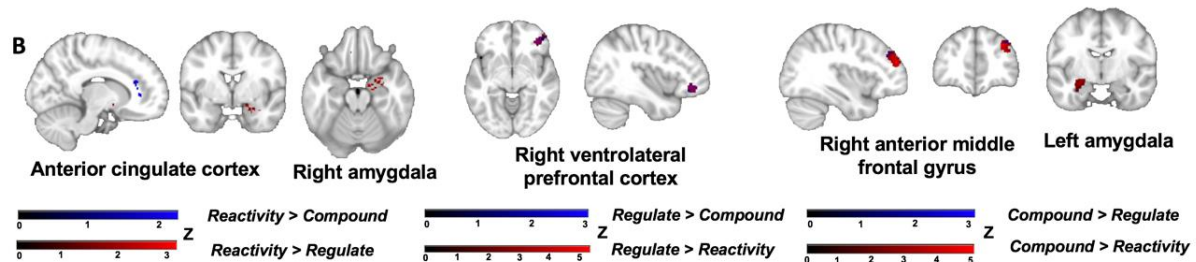

FIGURE S10. **A.** Conjunctions of transdiagnostic aberrant activation (i.e., pooled across disorder and patient hyper- and hypo-activation) for reactivity, regulation, and compound processing tasks. Shared disruption in left ventrolateral prefrontal cortex was demonstrated during emotional reactivity and regulation and in right amygdala during emotional reactivity and compound processing. **B.** Contrasts of transdiagnostic aberrant activation (i.e., pooled across disorder and patient hyper- and hypo-activation) for reactivity, regulation, and compound processing tasks.

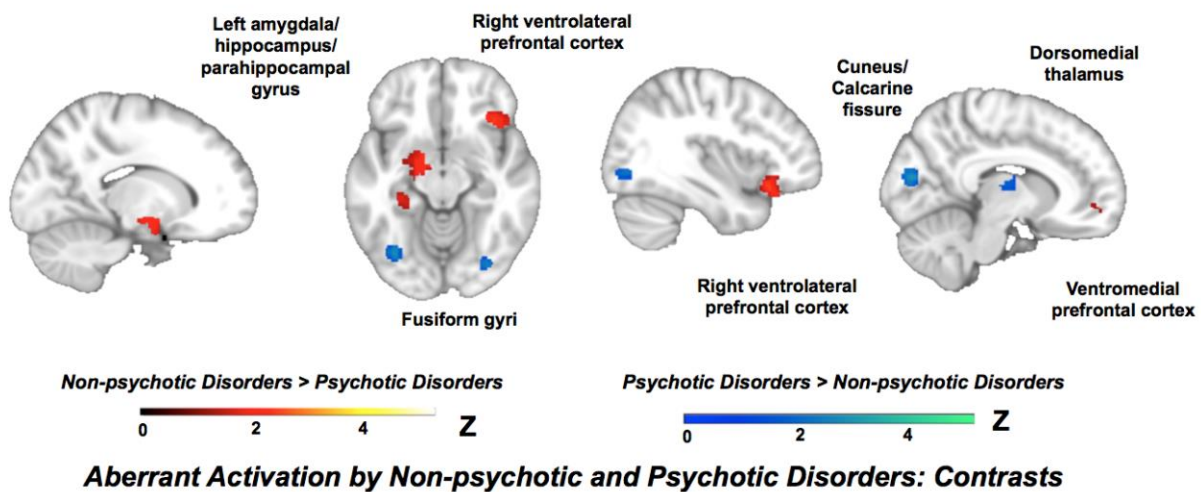

FIGURE S11. Contrasts of transdiagnostic aberrant activation (i.e., pooled across disorder, patient hyper- and hypo-activation and processing tasks) for non-psychotic and psychotic disorder groups.



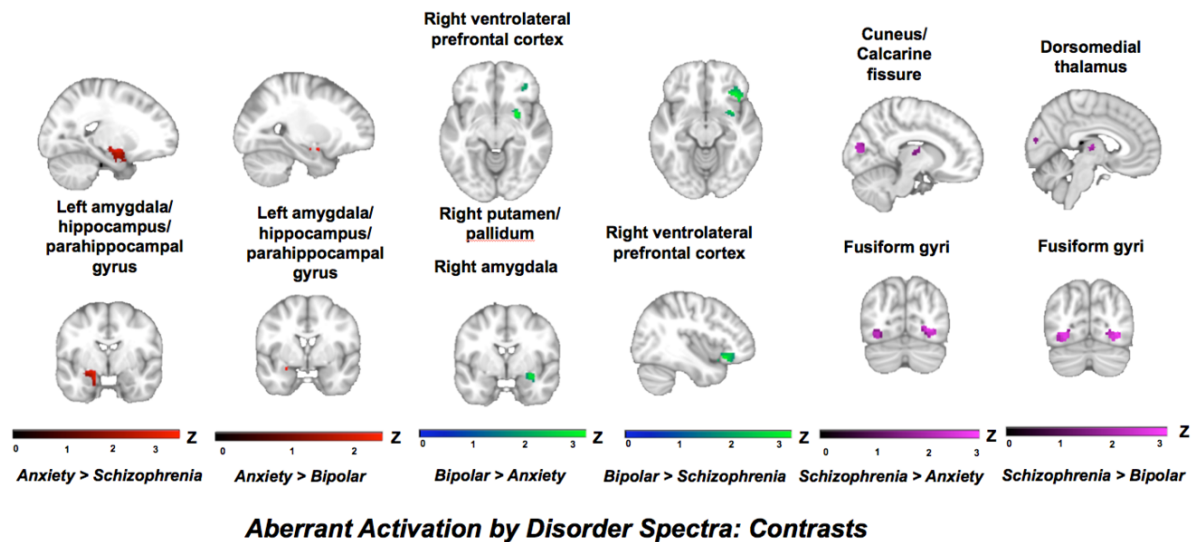

FIGURE S12. Contrasts of aberrant activation (i.e., pooled across patient hyper- and hypo-activation and tasks) for disorder spectra that showed convergence. Unipolar depressive and substance use disorder groups did not show convergence.

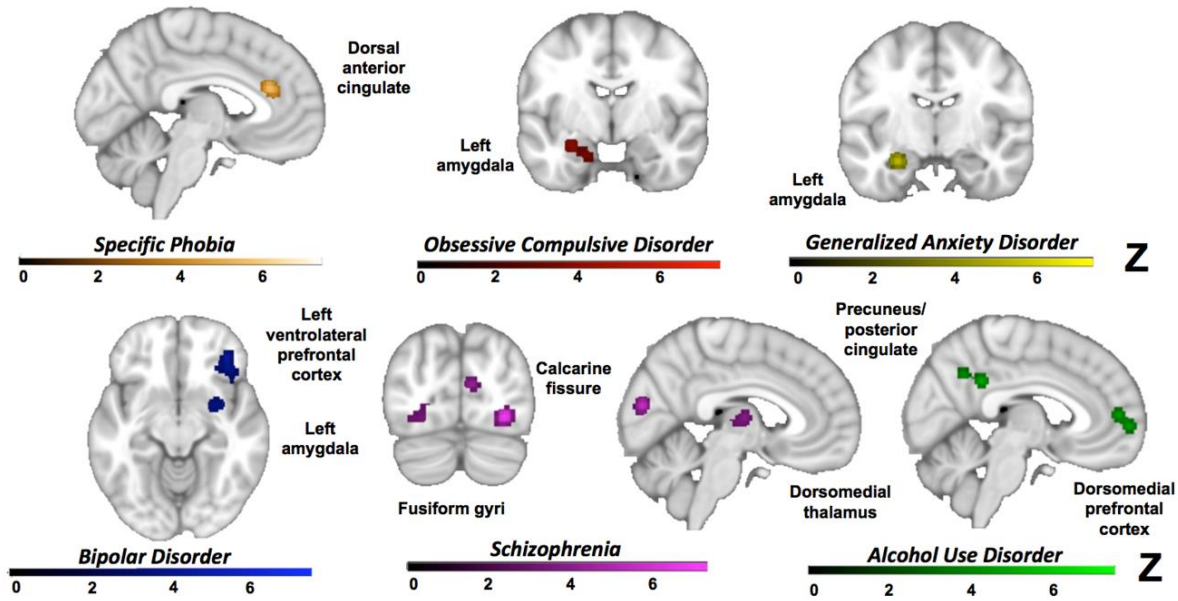

**Aberrant Activation by Specific Disorder**

FIGURE S13. Contrasts of aberrant activation (i.e., pooled across patient hyper- and hypo-activation and tasks) for specific disorder groups. Convergence was observed for specific phobia (n=11), OCD (n=20), GAD (n=10), bipolar disorder (n=47), schizophrenia (n=59), and alcohol use disorder (n=6). No convergence was observed for unipolar depressive disorders (n=79), PTSD (n=28), social anxiety disorder (n=17), cocaine use disorder (n=8), panic disorder (n=5), methamphetamine use disorder (n=3), mixed anxiety disorders (n=2), cannabis use disorder (n=2), and mixed anxiety and depressive disorders (n=1).

**Percent of Experimental Contrasts  
Contributing to Convergence by Broad Disorder  
Grouping**

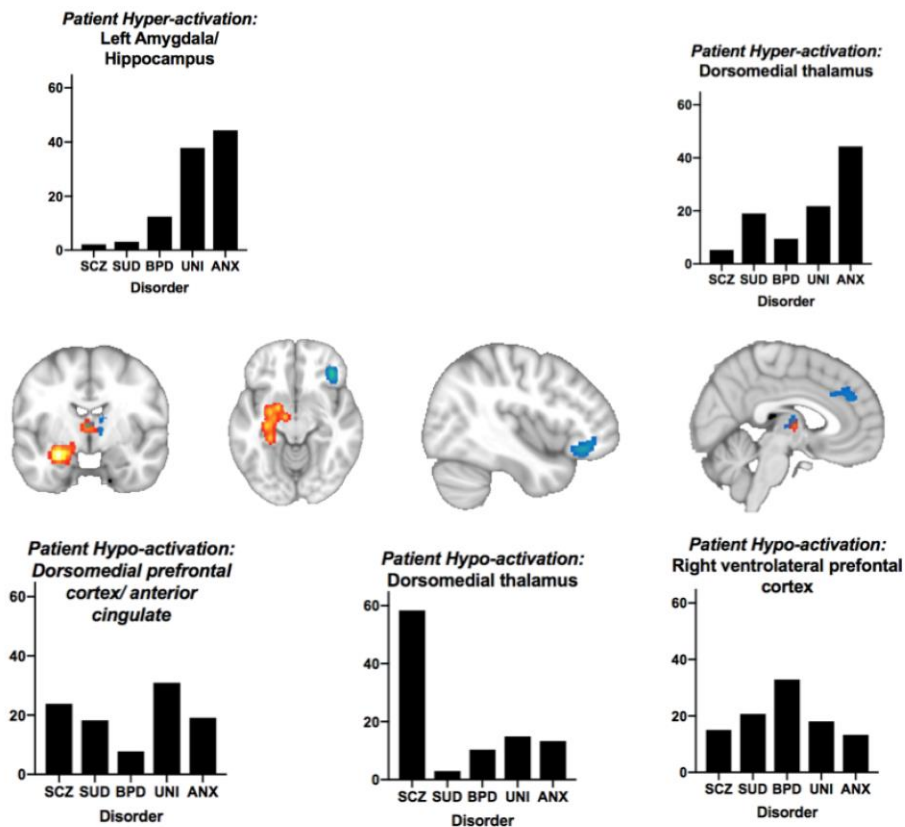

FIGURE S14. Percent of experimental contrasts contributing to convergence according to broad diagnostic grouping. ANX=anxiety spectrum disorders; UNI=unipolar depression spectrum disorders; BIP=bipolar spectrum disorders; SCZ=schizophrenia spectrum disorders; SUD=substance use disorders.

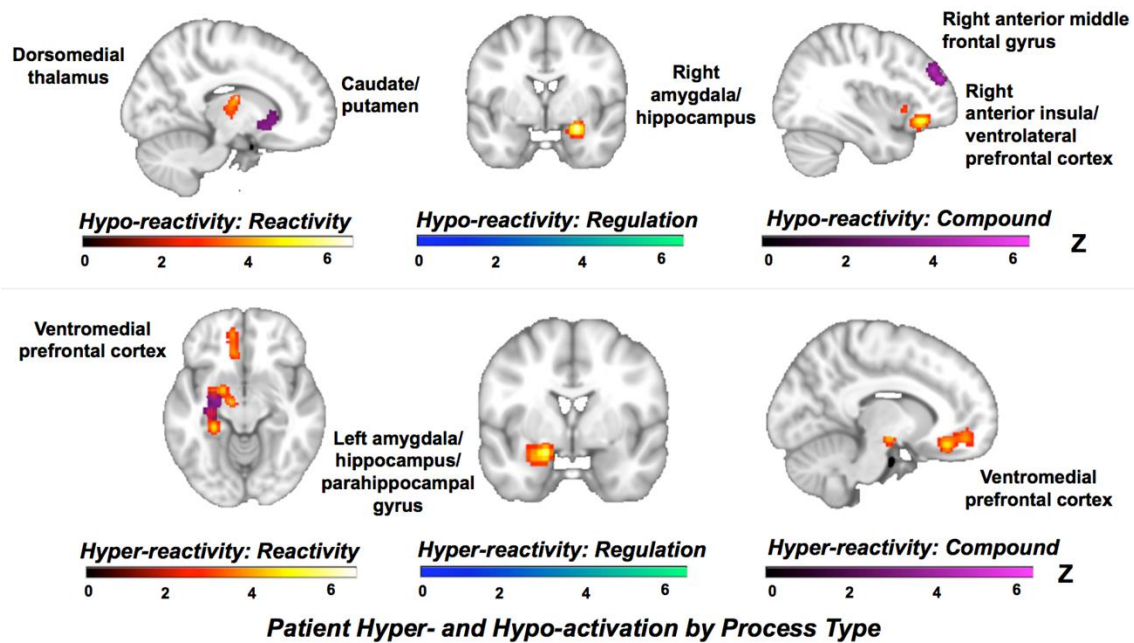

FIGURE S15. Regions of transdiagnostic aberrant activation during emotional processing (i.e., pooled across disorder and patient hyper- and hypo-activation) separated by processing types.

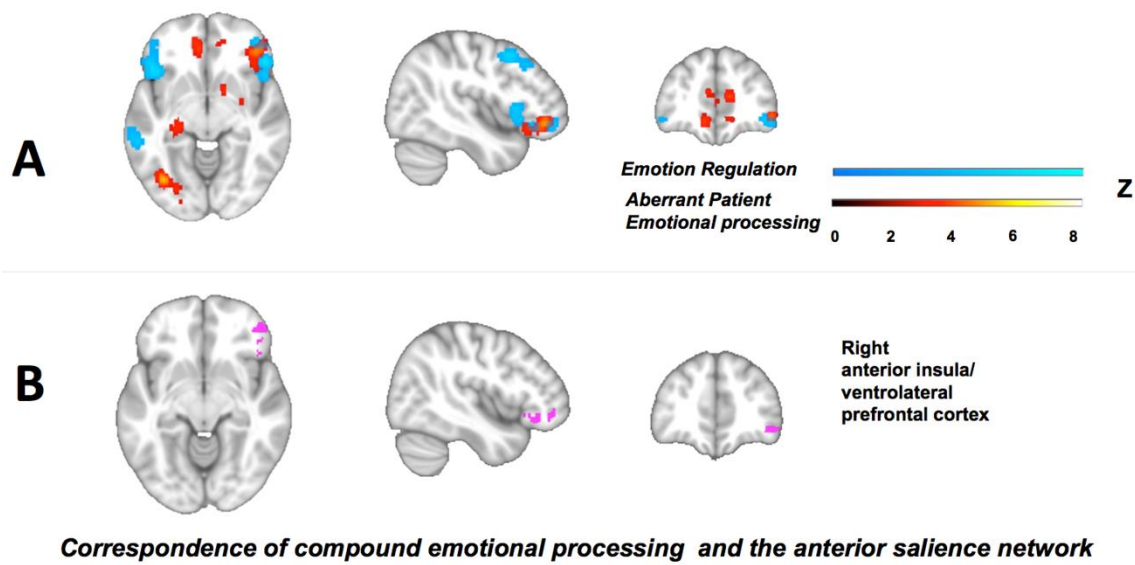

FIGURE S16. A. Regions of transdiagnostic aberrant activation during emotional processing tasks (i.e., pooled across disorder, patient hyper- and hypo-activation) (RED) and the regions involved in intact cognitive emotion regulation as identified by Langner and colleagues ((1). B. Conjunction between regions of transdiagnostic aberrant activation during emotional processing tasks (i.e., pooled across patient hyper- and hypo-activation) and the regions involved in intact cognitive emotion regulation as identified by Langner and colleagues.

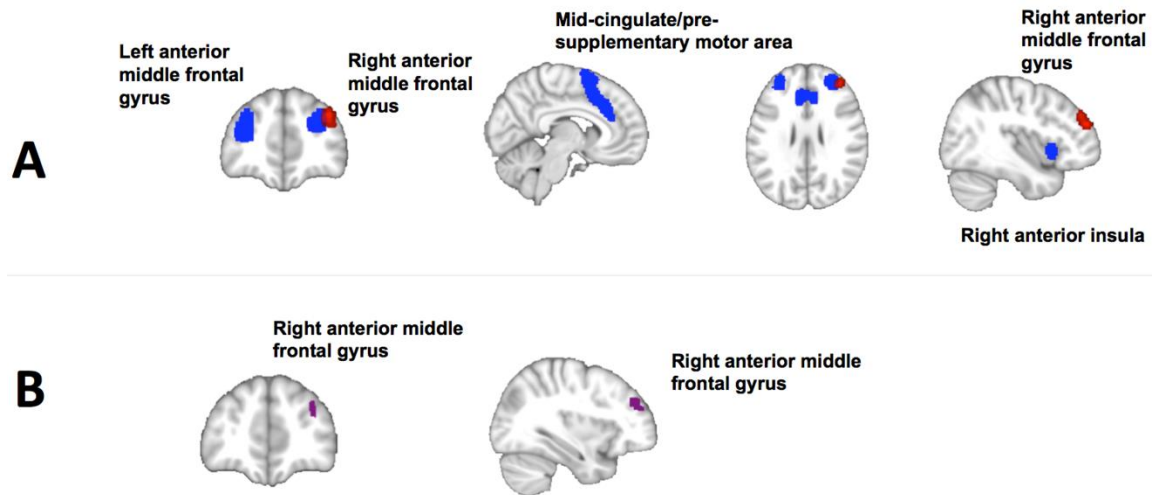

***Correspondence of compound emotional processing and the anterior salience network***

FIGURE S17. A. Regions of transdiagnostic aberrant activation during compound emotional processing tasks (i.e., pooled across disorder and patient hyper- and hypo-activation) (RED) and the anterior salience network identified by Shirer and colleagues (2). B. Conjunction between regions of transdiagnostic aberrant activation during compound emotional processing tasks (i.e., pooled across disorder and patient hyper- and hypo-activation) and the anterior salience network identified by Shirer and colleagues (2012) (PURPLE).

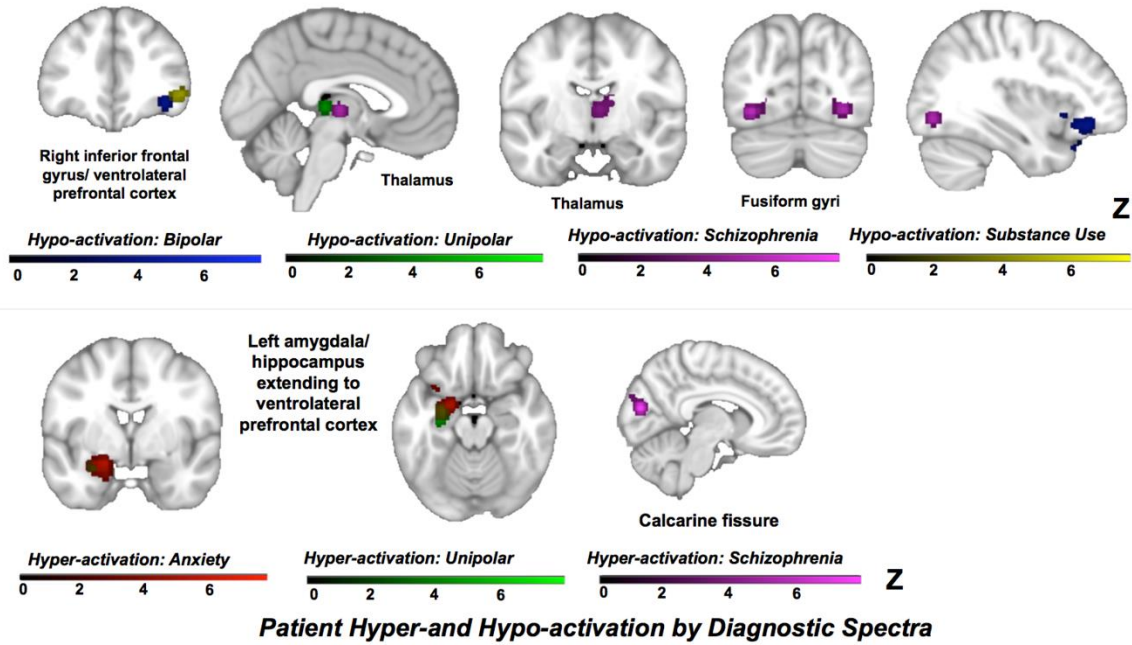

FIGURE S18. Regions of disruption by diagnostic spectra, separated by patient hyper- and hypo-activation.

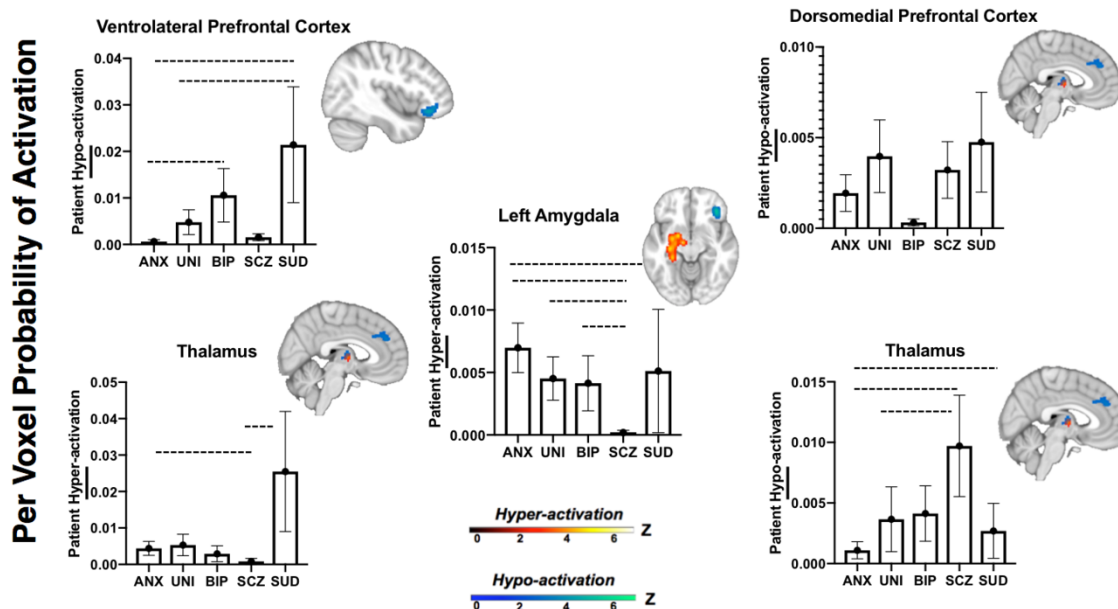

FIGURE S19. Extracted mean per voxel probability of patient hyper- (red) and hypo-activation (blue) relative to control participants by disorder class. ANX=anxiety spectrum disorders; UNI=unipolar depression spectrum disorders; BIP=bipolar spectrum disorders; SCZ=schizophrenia spectrum disorders; SUD=substance use disorders. Consistent with a transdiagnostic signature, a broad distribution of disorders contributed to each of the clusters of convergence. This was confirmed by follow up region of interest (ROI) analyses on extracted data from the five significant clusters. Significant omnibus results were observed for patient hypo-activation in ventrolateral prefrontal cortex (Kruskal-Wallis Test,  $H=15.1$ ,  $p<.01$ ) and thalamus ( $U=17.7$ ,  $p<.01$ ) and hyper-activation in left amygdala ( $U=19.2$ ,  $p<.01$ ). Exploratory pairwise comparisons were computed. Dashed lines indicate significant differences, uncorrected for multiple comparisons.



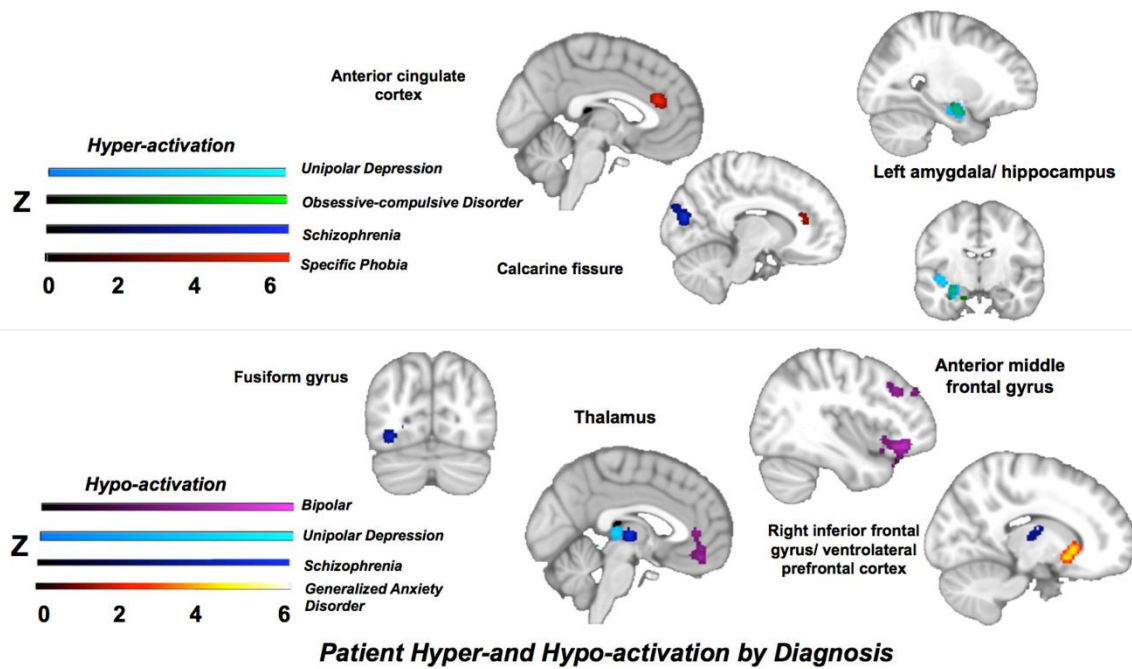

FIGURE S20. Regions of disruption by specific diagnosis, separated by patient hyper- and hypo-activation. Disorders that showed convergence for patient hyper-activation were unipolar depression (n=79), bipolar depression (n=47), and schizophrenia (n=59). GAD also showed convergence though the results should be interpreted with caution given the inclusion of only 10 experiments. Disorders that showed convergence for patient hypo-activation were unipolar depression (n=79), schizophrenia (n=59), and OCD (n=20). Specific phobia also showed convergence though the results should be interpreted with caution given the inclusion of only 10 experiments.

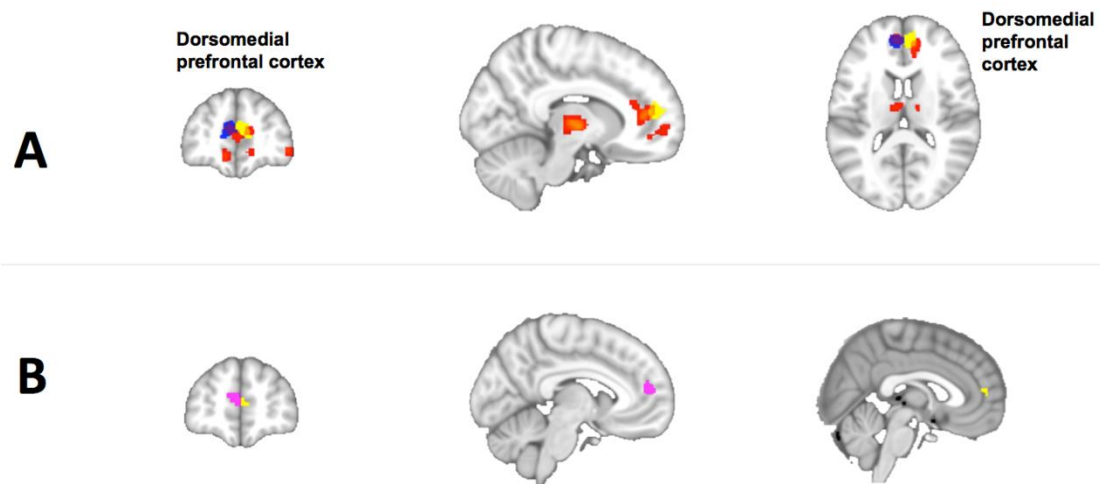

***Correspondence of aberrant emotional processing and parcellations of the dorsomedial prefrontal cortex***

FIGURE S21. A. Regions of transdiagnostic aberrant activation during emotional processing tasks (i.e., pooled across disorder, patient hyper- and hypo-activation, and processing tasks) (RED) and the dorsomedial prefrontal regions parcellated by Eickhoff and colleagues (3) and the conjunction (B).

TABLE S1. Experiments included in meta-analysis by diagnostic grouping, process, task and stimuli (reference list follows the table)

| Ref # | Experiment # | PUBMEDID | Diagnostic Group | Process    | Experimental Task          | Stimuli  |
|-------|--------------|----------|------------------|------------|----------------------------|----------|
| (1)   | 1            | 17010993 | MDD              | Reactivity | Picture viewing            | Pictures |
| (2)   | 2            | 22978709 | SUD              | Regulate   | Picture viewing regulation | Pictures |
| (2)   | 3            | 22978709 | SUD              | Regulate   | Picture viewing regulation | Pictures |
| (3)   | 4            | 15860337 | ANX              | Reactivity | Picture viewing            | Faces    |
| (3)   | 5            | 15860337 | ANX              | Reactivity | Picture viewing            | Faces    |
| (3)   | 6            | 15860337 | ANX              | Reactivity | Picture viewing            | Faces    |
| (4)   | 7            | 18180763 | ANX              | Reactivity | Picture viewing            | Pictures |
| (4)   | 8            | 18180763 | ANX              | Reactivity | Picture viewing            | Pictures |
| (4)   | 9            | 18180763 | ANX              | Reactivity | Picture viewing            | Pictures |
| (4)   | 10           | 18180763 | ANX              | Reactivity | Picture viewing            | Pictures |
| (5)   | 11           | 20579005 | SUD              | Reactivity | Picture viewing            | Pictures |
| (6)   | 12           | 24381810 | SCZ              | Compound   | Delayed discounting        | Pictures |
| (7)   | 13           | 17570347 | MDD              | Reactivity | Pain perception            | Heat     |
| (8)   | 14           | 25183555 | ANX              | Reactivity | Anticipation               | Shapes   |
| (8)   | 15           | 25183555 | ANX              | Reactivity | Anticipation               | Shapes   |
| (9)   | 16           | 26456416 | ANX              | Compound   | Go / No Go                 | Pictures |
| (10)  | 17           | 19950195 | BPD              | Reactivity | Monetary incentive delay   | Shapes   |
| (11)  | 18           | 19632301 | MDD              | Reactivity | Picture viewing            | Pictures |
| (12)  | 19           | 10553744 | ANX              | Reactivity | Script reactivity          | Scripts  |
| (13)  | 20           | 10202567 | ANX              | Reactivity | Listen                     | Audio    |
| (14)  | 21           | 15997600 | ANX              | Reactivity | Conditioning               | Pictures |
| (15)  | 22           | 15013830 | ANX              | Compound   | Stroop                     | Words    |
| (16)  | 23           | 17182108 | ANX              | Compound   | Word recognition           | Words    |
| (17)  | 24           | 12742675 | ANX              | Compound   | Word recognition           | Words    |
| (18)  | 25           | 25085721 | MDD              | Reactivity | Picture viewing            | Faces    |
| (19)  | 26           | 23298715 | MDD              | Reactivity | Picture viewing            | Faces    |
| (20)  | 27           | 19434621 | ANX              | Reactivity | Stroop                     | Words    |
| (21)  | 28           | 21215728 | ANX              | Reactivity | Anticipation               | Pictures |
| (22)  | 29           | 28205606 | MDD              | Reactivity | Picture viewing            | Faces    |
| (23)  | 30           | 27921216 | MDD              | Reactivity | Script reactivity          | Scripts  |
| (23)  | 31           | 27921216 | MDD              | Reactivity | Script reactivity          | Scripts  |
| (24)  | 32           | 15570157 | MDD              | Reactivity | Lexical decision task      | Words    |
| (25)  | 33           | 21781000 | ANX              | Reactivity | Picture viewing            | Faces    |
| (26)  | 34           | 23558337 | BPD              | Reactivity | Anticipation               | Pictures |
| (27)  | 35           | 20950283 | ANX              | Reactivity | Picture viewing            | Pictures |
| (27)  | 36           | 20950283 | ANX              | Reactivity | Picture viewing            | Pictures |
| (28)  | 37           | 24990479 | BPD              | Compound   | CPT                        | Pictures |
| (28)  | 38           | 24990479 | BPD              | Compound   | CPT                        | Pictures |
| (29)  | 39           | 15289277 | BPD              | Reactivity | Picture viewing            | Pictures |
| (30)  | 40           | 23469861 | SUD              | Reactivity | Picture viewing            | Faces    |

|      |    |          |     |            |                            |          |
|------|----|----------|-----|------------|----------------------------|----------|
| (31) | 41 | 27672555 | MDD | Compound   | Picture viewing            | Faces    |
| (32) | 42 | 16112653 | BPD | Reactivity | Picture viewing            | Faces    |
| (33) | 43 | 25635920 | MDD | Compound   | Go/ No Go                  | Faces    |
| (34) | 44 | 21098808 | MDD | Reactivity | Script reactivity          | Scripts  |
| (35) | 45 | 21557888 | MDD | Reactivity | Picture viewing            | Faces    |
| (36) | 46 | 22306196 | SCZ | Reactivity | Picture recognition        | Faces    |
| (36) | 47 | 22306196 | SCZ | Reactivity | Picture viewing            | Pictures |
| (36) | 48 | 22306196 | SCZ | Reactivity | Script reactivity          | Scripts  |
| (37) | 49 | 21777105 | MDD | Reactivity | Picture viewing            | Faces    |
| (38) | 50 | 24493839 | BPD | Reactivity | Picture viewing            | Faces    |
| (39) | 51 | 21267430 | SCZ | Reactivity | Conditioning               | Shapes   |
| (40) | 52 | 18706701 | MDD | Compound   | Picture viewing            | Pictures |
| (41) | 53 | 23355265 | BPD | Reactivity | Picture viewing            | Faces    |
| (41) | 54 | 23355265 | BPD | Reactivity | Picture viewing            | Faces    |
| (42) | 55 | 12893418 | ANX | Reactivity | Picture viewing            | Pictures |
| (43) | 56 | 22574121 | SCZ | Reactivity | Picture viewing            | Pictures |
| (44) | 57 | 23051903 | SCZ | Reactivity | Picture viewing            | Faces    |
| (45) | 58 | 15184035 | BPD | Compound   | Go/No Go                   | Words    |
| (46) | 59 | 12090812 | MDD | Compound   | Go/No Go                   | Words    |
| (47) | 60 | 25799565 | SUD | Reactivity | Monetary incentive delay   | Shapes   |
| (48) | 61 | 17012690 | MDD | Reactivity | Word reading               | Words    |
| (49) | 62 | 17595018 | ANX | Reactivity | Picture viewing            | Faces    |
| (50) | 63 | 24156926 | BPD | Compound   | Picture viewing            | Faces    |
| (50) | 64 | 24156926 | BPD | Compound   | Picture viewing            | Faces    |
| (51) | 65 | 26244883 | BPD | Compound   | Picture viewing            | Faces    |
| (52) | 66 | 23473989 | MDD | Reactivity | Anticipation               | Pictures |
| (53) | 67 | 27436308 | ANX | Reactivity | Picture viewing            | Pictures |
| (54) | 68 | 28501740 | ANX | Reactivity | Picture viewing regulation | Pictures |
| (55) | 69 | 18063349 | BPD | Reactivity | Picture viewing            | Faces    |
| (56) | 70 | 21854858 | BPD | Reactivity | Picture viewing            | Faces    |
| (57) | 71 | 24146315 | MDD | Compound   | Video                      | Video    |
| (58) | 72 | 25171782 | ANX | Reactivity | Picture viewing            | Faces    |
| (59) | 73 | 23911154 | BPD | Reactivity | Picture viewing            | Faces    |
| (59) | 74 | 23911154 | MDD | Reactivity | Picture viewing            | Faces    |
| (60) | 75 | 22571805 | MDD | Compound   | Picture viewing            | Faces    |
| (60) | 76 | 22571805 | MDD | Reactivity | Picture viewing            | Faces    |
| (61) | 77 | 17965984 | MDD | Reactivity | Picture recognition        | Faces    |
| (62) | 78 | 25880400 | MDD | Reactivity | Stroop                     | Faces    |
| (63) | 79 | 17403973 | MDD | Reactivity | Implicit picture viewing   | Faces    |
| (64) | 80 | 15351766 | MDD | Reactivity | Implicit picture viewing   | Faces    |
| (64) | 81 | 15351766 | MDD | Reactivity | Picture viewing            | Faces    |
| (65) | 82 | 24690369 | ANX | Reactivity | Picture viewing            | Pictures |
| (66) | 83 | 25274821 | ANX | Reactivity | Conditioning               | Video    |
| (67) | 84 | 18771714 | ANX | Compound   | N-back                     | Faces    |
| (68) | 85 | 18507736 | SUD | Reactivity | Picture viewing            | Pictures |
| (69) | 86 | 19188539 | ANX | Reactivity | Picture viewing            | Faces    |
| (70) | 87 | 24760279 | ANX | Reactivity | Picture viewing            | Pictures |

|       |     |          |     |            |                          |          |
|-------|-----|----------|-----|------------|--------------------------|----------|
| (71)  | 88  | 17499485 | MDD | Reactivity | Picture viewing          | Faces    |
| (72)  | 89  | 16237317 | MDD | Reactivity | Picture viewing          | Faces    |
| (73)  | 90  | 26763141 | MDD | Reactivity | Prisoners dilemma        | Words    |
| (74)  | 91  | 23146249 | SCZ | Reactivity | Conditioning             | Shapes   |
| (75)  | 92  | 23769293 | MDD | Reactivity | Picture viewing          | Faces    |
| (76)  | 93  | 23482626 | MDD | Regulate   | Picture viewing          | Pictures |
| (77)  | 94  | 18536699 | MDD | Reactivity | Picture viewing          | Pictures |
| (78)  | 95  | 19656642 | SUD | Reactivity | Implicit picture viewing | Faces    |
| (79)  | 96  | 29524918 | SCZ | Compound   | N-back                   | Faces    |
| (80)  | 97  | 18056543 | SCZ | Reactivity | Picture viewing          | Faces    |
| (81)  | 98  | 20663646 | SCZ | Reactivity | Picture viewing          | Faces    |
| (82)  | 99  | 20642398 | SCZ | Compound   | N-back                   | Odor     |
| (83)  | 100 | 25151338 | BPD | Reactivity | Picture viewing          | Faces    |
| (84)  | 101 | 18295746 | SCZ | Reactivity | Implicit picture viewing | Faces    |
| (85)  | 102 | 26619965 | ANX | Reactivity | Picture viewing          | Pictures |
| (86)  | 103 | 19594507 | BPD | Reactivity | Picture viewing          | Faces    |
| (87)  | 104 | 17488322 | SUD | Reactivity | Picture viewing          | Pictures |
| (88)  | 105 | 28224080 | ANX | Reactivity | Picture viewing          | Faces    |
| (88)  | 106 | 28224080 | ANX | Reactivity | Picture viewing          | Pictures |
| (89)  | 107 | 20080793 | MDD | Regulate   | Picture viewing          | Pictures |
| (90)  | 108 | 25448398 | MDD | Reactivity | Picture viewing          | Faces    |
| (91)  | 109 | 25827506 | MDD | Reactivity | Picture viewing          | Faces    |
| (92)  | 110 | 28551555 | BPD | Reactivity | Picture viewing          | Pictures |
| (93)  | 111 | 24738049 | ANX | Reactivity | Listen                   | Audio    |
| (94)  | 112 | 22945619 | SCZ | Reactivity | Conditioning             | Pictures |
| (95)  | 113 | 19605517 | SCZ | Reactivity | Conditioning             | Scripts  |
| (96)  | 114 | 24416328 | SCZ | Reactivity | Script reactivity        | Scripts  |
| (97)  | 115 | 17331476 | ANX | Reactivity | Picture viewing          | Pictures |
| (97)  | 116 | 17331476 | ANX | Reactivity | Picture recognition      | Pictures |
| (98)  | 117 | 18310580 | BPD | Reactivity | Picture viewing          | Faces    |
| (99)  | 118 | 17699669 | MDD | Regulate   | Picture recognition      | Pictures |
| (100) | 119 | 18346998 | MDD | Reactivity | Picture viewing          | Faces    |
| (101) | 120 | 21175552 | ANX | Reactivity | Monetary incentive delay | Shapes   |
| (102) | 121 | 18818053 | SCZ | Reactivity | Listen                   | Audio    |
| (102) | 122 | 18818053 | SCZ | Reactivity | Listen                   | Audio    |
| (103) | 123 | 15993859 | MDD | Reactivity | Script reactivity        | Scripts  |
| (104) | 124 | 22273442 | BPD | Reactivity | Implicit picture viewing | Faces    |
| (105) | 125 | 18797310 | BPD | Reactivity | Picture viewing          | Faces    |
| (106) | 126 | 19632283 | BPD | Reactivity | Picture viewing          | Avatars  |
| (107) | 127 | 26103120 | SCZ | Compound   | Implicit word retrieval  | Words    |
| (107) | 128 | 26103120 | SCZ | Reactivity | Encoding words           | Words    |
| (108) | 129 | 23547713 | ANX | Reactivity | Picture viewing          | Faces    |
| (109) | 130 | 17916330 | MDD | Reactivity | Monetary incentive delay | Shapes   |
| (110) | 131 | 14550677 | MDD | Reactivity | Picture viewing          | Pictures |
| (110) | 132 | 14550677 | MDD | Regulate   | Picture viewing          | Pictures |

|       |     |          |     |            |                          |           |
|-------|-----|----------|-----|------------|--------------------------|-----------|
| (111) | 133 | 17885606 | BPD | Compound   | Stroop                   | Words     |
| (112) | 134 | 22079660 | SCZ | Compound   | Picture viewing          | Pictures  |
| (112) | 135 | 22079660 | SCZ | Reactivity | Picture viewing          | Pictures  |
| (113) | 136 | 24381781 | SCZ | Reactivity | Picture viewing          | Pictures  |
| (114) | 137 | 12208637 | ANX | Reactivity | Script reactivity        | Scripts   |
| (115) | 138 | 11691703 | ANX | Reactivity | Script reactivity        | Scripts   |
| (116) | 139 | 12559652 | ANX | Reactivity | Script reactivity        | Scripts   |
| (117) | 140 | 24268934 | SCZ | Reactivity | Picture viewing          | N-back    |
| (118) | 141 | 24619004 | SCZ | Reactivity | Picture viewing          | Pictures  |
| (119) | 142 | 15500300 | BPD | Reactivity | Picture viewing          | Faces     |
| (120) | 143 | 21284912 | SCZ | Reactivity | Picture viewing          | Faces     |
| (121) | 144 | 22113155 | SCZ | Reactivity | Picture viewing          | Faces     |
| (122) | 145 | 28285207 | MDD | Reactivity | Word reading             | Words     |
| (123) | 146 | 15576062 | ANX | Reactivity | Script reactivity        | Scripts   |
| (124) | 147 | 24465469 | SCZ | Reactivity | Implicit picture viewing | Faces     |
| (125) | 148 | 23201307 | SCZ | Reactivity | Conditioning             | Shapes    |
| (126) | 149 | 22524493 | BPD | Reactivity | Picture viewing          | Faces     |
| (127) | 150 | 15597038 | ANX | Reactivity | Speech anticipation      | Speech    |
| (128) | 151 | 23611156 | ANX | Reactivity | Conditioning             | Shapes    |
| (129) | 152 | 12634477 | ANX | Reactivity | Word reading             | Words     |
| (130) | 153 | 16837058 | BPD | Reactivity | Word recognition         | Words     |
| (131) | 154 | 16225562 | BPD | Compound   | Stroop                   | Words     |
| (132) | 155 | 17547581 | BPD | Reactivity | Picture viewing          | Pictures  |
| (133) | 156 | 21664220 | BPD | Reactivity | Picture viewing          | Faces     |
| (134) | 157 | 15184236 | ANX | Reactivity | Picture viewing          | Pictures  |
| (134) | 158 | 15184236 | ANX | Reactivity | Picture viewing          | Pictures  |
| (134) | 159 | 15184236 | ANX | Reactivity | Picture viewing          | Pictures  |
| (134) | 160 | 15184236 | ANX | Reactivity | Picture viewing          | Pictures  |
| (135) | 161 | 23806873 | SUD | Reactivity | Anticipation             | Shapes    |
| (136) | 162 | 23385487 | ANX | Reactivity | Picture viewing          | Pictures  |
| (137) | 163 | 23738207 | SCZ | Reactivity | Picture viewing          | Pictures  |
| (137) | 164 | 23738207 | SCZ | Reactivity | Picture viewing          | Pictures  |
| (138) | 165 | 18310578 | SCZ | Reactivity | Picture viewing          | Faces     |
| (139) | 166 | 24434194 | SCZ | Reactivity | Picture viewing          | Faces     |
| (140) | 167 | 23740049 | ANX | Reactivity | Conditioning             | Pictures  |
| (141) | 168 | 19748076 | ANX | Reactivity | Conditioning             | Shapes    |
| (141) | 169 | 19748076 | ANX | Reactivity | Conditioning             | Faces     |
| (142) | 170 | 22398297 | MDD | Regulate   | Picture viewing          | Faces     |
| (143) | 171 | 14990520 | SCZ | Reactivity | Listen                   | Sentences |
| (143) | 172 | 14990520 | SCZ | Reactivity | Listen                   | Sentences |
| (143) | 173 | 14990520 | SCZ | Reactivity | Listen                   | Sentences |
| (143) | 174 | 14990520 | SCZ | Reactivity | Listen                   | Sentences |
| (143) | 175 | 14990520 | SCZ | Reactivity | Listen                   | Sentences |
| (144) | 176 | 12598724 | MDD | Reactivity | Picture viewing          | Pictures  |
| (145) | 177 | 17825123 | MDD | Compound   | Stroop                   | Words     |
| (146) | 178 | 24258223 | SUD | Compound   | Stroop                   | Words     |
| (147) | 179 | 18458208 | ANX | Compound   | Dot probe                | Faces     |
| (148) | 180 | 25781332 | ANX | Compound   | Picture viewing          | Pictures  |
| (149) | 181 | 27442922 | ANX | Compound   | Picture recognition      | Pictures  |

|       |     |          |         |            |                            |          |
|-------|-----|----------|---------|------------|----------------------------|----------|
| (150) | 182 | 26277269 | ANX     | Compound   | Word recognition           | Words    |
| (151) | 183 | 26924833 | ANX     | Compound   | Word recognition           | Words    |
| (152) | 184 | 22832855 | SCZ     | Regulate   | Picture viewing regulation | Pictures |
| (152) | 185 | 22832855 | BPD     | Regulate   | Picture viewing regulation | Pictures |
| (153) | 186 | 24888525 | SCZ     | Reactivity | Picture viewing            | Faces    |
| (154) | 187 | 17684497 | SCZ     | Reactivity | Reinforcement learning     | Shapes   |
| (155) | 188 | 25689570 | MDD     | Reactivity | Picture viewing            | Faces    |
| (156) | 189 | 27547195 | ANX     | Reactivity | Picture viewing            | Pictures |
| (156) | 190 | 27547195 | ANX     | Reactivity | Picture viewing            | Pictures |
| (157) | 191 | 22548898 | BPD     | Reactivity | Anticipation               | Pictures |
| (158) | 192 | 26329118 | SCZ     | Compound   | Picture recognition        | Pictures |
| (159) | 193 | 20716396 | ANX     | Reactivity | Picture viewing            | Faces    |
| (160) | 194 | 14514490 | SCZ     | Reactivity | Picture viewing            | Pictures |
| (161) | 195 | 19409961 | SCZ     | Reactivity | Listen                     | Audio    |
| (162) | 196 | 19849880 | BPD     | Compound   | Stroop                     | Words    |
| (163) | 197 | 20855051 | BPD     | Compound   | N-back                     | Faces    |
| (164) | 198 | 19419593 | ANX     | Reactivity | Script reactivity          | Scripts  |
| (165) | 199 | 18827725 | SCZ     | Compound   | N-back                     | Odor     |
| (166) | 200 | 17097071 | BPD     | Reactivity | Picture viewing            | Faces    |
| (167) | 201 | 19242292 | BPD     | Reactivity | Implicit picture viewing   | Faces    |
| (168) | 202 | 17964741 | SUD     | Reactivity | Picture viewing            | Faces    |
| (169) | 203 | 22832817 | BPD     | Reactivity | Picture viewing            | Faces    |
| (170) | 204 | 24290464 | BPD     | Compound   | Implicit picture viewing   | Faces    |
| (171) | 205 | 21159729 | SCZ     | Reactivity | Picture viewing            | Faces    |
| (172) | 206 | 19411368 | MDD     | Reactivity | Monetary incentive delay   | Shapes   |
| (173) | 207 | 22901627 | ANX/DEP | Reactivity | Picture viewing            | Pictures |
| (174) | 208 | 22294257 | SUD     | Reactivity | Script reactivity          | Scripts  |
| (174) | 209 | 22294257 | SUD     | Reactivity | Script reactivity          | Scripts  |
| (175) | 210 | 22833192 | ANX     | Compound   | Stroop                     | Pictures |
| (176) | 211 | 22895096 | ANX     | Reactivity | Script reactivity          | Scripts  |
| (177) | 212 | 29304386 | MDD     | Reactivity | Picture viewing            | Faces    |
| (178) | 213 | 28197859 | MDD     | Regulate   | Picture viewing            | Faces    |
| (179) | 214 | 26529426 | ANX     | Compound   | Picture viewing regulation | Pictures |
| (179) | 215 | 26529426 | ANX     | Regulate   | Picture viewing regulation | Pictures |
| (180) | 216 | 19171077 | ANX     | Reactivity | Reversal learning          | Pictures |
| (180) | 217 | 19171077 | BPD     | Reactivity | Reversal learning          | Pictures |
| (181) | 218 | 17467008 | SCZ     | Reactivity | Picture viewing            | Faces    |
| (182) | 219 | 24862389 | BPD     | Compound   | Stroop                     | Pictures |
| (183) | 220 | 20934190 | MDD     | Reactivity | Picture viewing            | Pictures |
| (184) | 221 | 24569319 | SUD     | Reactivity | Reinforcement learning     | Shapes   |
| (185) | 222 | 15955491 | ANX     | Reactivity | Implicit picture viewing   | Pictures |

|       |     |          |         |            |                          |           |
|-------|-----|----------|---------|------------|--------------------------|-----------|
| (186) | 223 | 21477817 | MDD     | Reactivity | Picture viewing          | Faces     |
| (187) | 224 | 20569645 | MDD     | Reactivity | Picture viewing          | Faces     |
| (188) | 225 | 17902000 | ANX     | Reactivity | Picture viewing          | Pictures  |
| (189) | 226 | 16046064 | ANX     | Reactivity | Picture viewing          | Pictures  |
| (190) | 227 | 22644919 | ANX     | Reactivity | Picture viewing          | Pictures  |
| (191) | 228 | 22321875 | ANX/DEP | Reactivity | Listen                   | Sentences |
| (191) | 229 | 22321875 | ANX/DEP | Reactivity | Picture viewing          | Faces     |
| (192) | 230 | 18580874 | SCZ     | Reactivity | Picture viewing          | Faces     |
| (193) | 231 | 27501356 | SUD     | Reactivity | Script reactivity        | Scripts   |
| (194) | 232 | 14512216 | ANX     | Reactivity | Picture viewing          | Pictures  |
| (195) | 233 | 10200737 | ANX     | Reactivity | Script reactivity        | Scripts   |
| (196) | 234 | 14757593 | ANX     | Reactivity | Script reactivity        | Scripts   |
| (197) | 235 | 11750889 | ANX     | Compound   | Stroop                   | Words     |
| (198) | 236 | 11983183 | MDD     | Compound   | Word reading             | Words     |
| (199) | 237 | 24818080 | ANX     | Compound   | Picture viewing          | Pictures  |
| (200) | 238 | 16163517 | SUD     | Reactivity | Script reactivity        | Scripts   |
| (201) | 239 | 19261334 | MDD     | Compound   | Decision making          | Pictures  |
| (202) | 240 | 23796796 | MDD     | Reactivity | Monetary incentive delay | Shapes    |
| (203) | 241 | 22079658 | MDD     | Reactivity | Monetary incentive delay | Shapes    |
| (204) | 242 | 28093278 | SCZ     | Reactivity | Picture viewing          | Faces     |
| (204) | 243 | 28093278 | SCZ     | Reactivity | Picture viewing          | Faces     |
| (205) | 244 | 28402574 | MDD     | Regulate   | Picture viewing          | Faces     |
| (205) | 245 | 28402574 | MDD     | Regulate   | Picture viewing          | Pictures  |
| (206) | 246 | 23827769 | ANX     | Reactivity | Picture viewing          | Faces     |
| (207) | 247 | 21051038 | BPD     | Reactivity | Picture viewing          | Pictures  |
| (208) | 248 | 17681799 | ANX     | Reactivity | Picture viewing          | Pictures  |
| (209) | 249 | 20100882 | MDD     | Compound   | CPT                      | Heat      |
| (210) | 250 | 23481626 | MDD     | Reactivity | Anticipation             | Shapes    |
| (211) | 251 | 18981339 | MDD     | Compound   | CPT                      | Heat      |
| (212) | 252 | 15691520 | MDD     | Reactivity | Picture viewing          | Faces     |
| (213) | 253 | 16487943 | SCZ     | Reactivity | Picture viewing          | Faces     |
| (214) | 254 | 20360158 | SCZ     | Reactivity | Picture viewing          | Faces     |
| (214) | 255 | 20360158 | SCZ     | Reactivity | Picture viewing          | Faces     |
| (215) | 256 | 20307892 | MDD     | Reactivity | Picture viewing          | Faces     |
| (216) | 257 | 20595014 | BPD     | Reactivity | Picture viewing          | Faces     |
| (216) | 258 | 20595014 | BPD     | Reactivity | Picture viewing          | Faces     |
| (217) | 259 | 15219596 | SCZ     | Reactivity | Picture viewing          | Pictures  |
| (218) | 260 | 12409155 | SCZ     | Reactivity | Picture viewing          | Pictures  |
| (219) | 261 | 19081708 | ANX     | Compound   | Word recognition         | Words     |
| (220) | 262 | 11481154 | ANX     | Reactivity | Speech anticipation      | Speech    |
| (221) | 263 | 22858151 | BPD     | Regulate   | Picture viewing          | Pictures  |
| (222) | 264 | 27814960 | MDD     | Compound   | Picture recognition      | Pictures  |
| (223) | 265 | 27747152 | SCZ     | Compound   | Picture recognition      | Faces     |
| (224) | 266 | 21205806 | SCZ     | Reactivity | Picture viewing          | Pictures  |
| (225) | 267 | 15664794 | ANX     | Reactivity | Picture viewing          | Pictures  |
| (226) | 268 | 16061770 | ANX     | Compound   | Stroop                   | Words     |
| (226) | 269 | 16061770 | ANX     | Compound   | Stroop                   | Words     |
| (227) | 270 | 21054920 | MDD     | Reactivity | Picture viewing          | Faces     |



|       |     |          |     |            |                              |          |
|-------|-----|----------|-----|------------|------------------------------|----------|
| (228) | 271 | 22617625 | SCZ | Compound   | Go/No Go                     | Words    |
| (229) | 272 | 17285093 | ANX | Reactivity | Smell                        | Odor     |
| (230) | 273 | 24262816 | ANX | Reactivity | Picture viewing              | Faces    |
| (231) | 274 | 23056309 | MDD | Reactivity | Picture viewing              | Faces    |
| (232) | 275 | 21041614 | MDD | Reactivity | Picture viewing              | Faces    |
| (233) | 276 | 23809145 | MDD | Reactivity | Picture viewing              | Faces    |
| (234) | 277 | 22773540 | BPD | Reactivity | Picture viewing              | Faces    |
| (235) | 278 | 25872899 | MDD | Reactivity | Stroop                       | Pictures |
| (235) | 279 | 25872899 | MDD | Reactivity | Stroop                       | Words    |
| (235) | 280 | 25872899 | MDD | Compound   | Stroop                       | Words    |
| (236) | 281 | 18450929 | MDD | Compound   | Oddball                      | Pictures |
| (237) | 282 | 18455373 | MDD | Compound   | Oddball                      | Pictures |
| (238) | 283 | 17403978 | BPD | Compound   | Go/No Go                     | Faces    |
| (239) | 284 | 19922553 | BPD | Reactivity | Picture recognition          | Pictures |
| (240) | 285 | 14992974 | SCZ | Reactivity | Implicit picture recognition | Faces    |
| (240) | 286 | 14992974 | SCZ | Reactivity | Implicit picture recognition | Faces    |
| (240) | 287 | 14992974 | SCZ | Reactivity | Implicit picture recognition | Faces    |
| (241) | 288 | 17398080 | SCZ | Reactivity | Picture viewing              | Faces    |
| (241) | 289 | 17398080 | SCZ | Reactivity | Picture viewing              | Faces    |
| (242) | 290 | 16216534 | ANX | Reactivity | Implicit picture viewing     | Faces    |
| (243) | 291 | 14625149 | ANX | Reactivity | Picture viewing              | Faces    |
| (244) | 292 | 24349161 | ANX | Compound   | Picture viewing regulation   | Pictures |
| (244) | 293 | 24349161 | ANX | Regulate   | Picture viewing regulation   | Pictures |
| (244) | 294 | 24349161 | ANX | Regulate   | Picture viewing regulation   | Pictures |
| (245) | 295 | 23888999 | SUD | Reactivity | Conditioning                 | Heat     |
| (245) | 296 | 23888999 | SUD | Reactivity | Conditioning                 | Shapes   |
| (245) | 297 | 23888999 | SUD | Reactivity | Conditioning                 | Heat     |
| (246) | 298 | 15235232 | MDD | Reactivity | Video                        | Video    |
| (247) | 299 | 26639452 | MDD | Compound   | Directed forgetting          | Words    |
| (248) | 300 | 17097275 | ANX | Reactivity | Picture viewing              | Faces    |
| (249) | 301 | 19589603 | MDD | Reactivity | Word reading                 | Words    |
| (250) | 302 | 24493842 | MDD | Reactivity | Script reactivity            | Scripts  |
| (251) | 303 | 27750155 | MDD | Reactivity | Picture viewing              | Pictures |
| (252) | 304 | 23911835 | ANX | Reactivity | Delayed discounting          | Shapes   |
| (253) | 305 | 21878364 | MDD | Reactivity | Picture viewing              | Faces    |
| (253) | 306 | 21878364 | MDD | Reactivity | Picture viewing              | Faces    |
| (254) | 307 | 24517388 | ANX | Regulate   | Picture viewing regulation   | Faces    |
| (254) | 308 | 24517388 | ANX | Regulate   | Picture viewing regulation   | Faces    |
| (254) | 309 | 24517388 | ANX | Regulate   | Picture viewing regulation   | Scripts  |

Ref=Reference number; Schizophrenia=schizophrenia, schizoaffective, schizophreniform, and delusional disorders; Bipolar=bipolar disorders; Unipolar= major depression, dysthymia; Anxiety=obsessive-compulsive disorder, posttraumatic stress disorder, social anxiety disorder, Substance Use=mixed substance abuse and/or dependence).

#### Studies Included In Meta-analysis

1. Abler B, Erk S, Herwig U, Walter H. Anticipation of aversive stimuli activates extended amygdala in unipolar depression. *Journal of psychiatric research*. 2007;41(6):511-22.
2. Albein-Urios N, Verdejo-Roman J, Asensio S, Soriano-Mas C, Martinez-Gonzalez JM, Verdejo-Garcia A. Re-appraisal of negative emotions in cocaine dependence: dysfunctional corticolimbic activation and connectivity. *Addiction biology*. 2014;19(3):415-26.
3. Amir N, Klumpp H, Elias J, Bedwell JS, Yanasak N, Miller LS. Increased activation of the anterior cingulate cortex during processing of disgust faces in individuals with social phobia. *Biological psychiatry*. 2005;57(9):975-81.
4. An SK, Mataix-Cols D, Lawrence NS, Wooderson S, Giampietro V, Speckens A, et al. To discard or not to discard: the neural basis of hoarding symptoms in obsessive-compulsive disorder. *Molecular psychiatry*. 2009;14(3):318-31.
5. Asensio S, Romero MJ, Palau C, Sanchez A, Senabre I, Morales JL, et al. Altered neural response of the appetitive emotional system in cocaine addiction: an fMRI Study. *Addiction biology*. 2010;15(4):504-16.
6. Avsar KB, Weller RE, Cox JE, Reid MA, White DM, Lahti AC. An fMRI investigation of delay discounting in patients with schizophrenia. *Brain Behav*. 2013;3(4):384-401.
7. Bar KJ, Wagner G, Koschke M, Boettger S, Boettger MK, Schlosser R, et al. Increased prefrontal activation during pain perception in major depression. *Biological psychiatry*. 2007;62(11):1281-7.
8. Benson BE, Guyer AE, Nelson EE, Pine DS, Ernst M. Role of contingency in striatal response to incentive in adolescents with anxiety. *Cogn Affect Behav Neurosci*. 2015;15(1):155-68.
9. Berlin HA, Schulz KP, Zhang S, Turetzky R, Rosenthal D, Goodman W. Neural correlates of emotional response inhibition in obsessive-compulsive disorder: A preliminary study. *Psychiatry research*. 2015;234(2):259-64.
10. Bermpohl F, Kahnt T, Dalanay U, Hagele C, Sajonz B, Wegner T, et al. Altered representation of expected value in the orbitofrontal cortex in mania. *Hum Brain Mapp*. 2010;31(7):958-69.
11. Bermpohl F, Walter M, Sajonz B, Lucke C, Hagele C, Sterzer P, et al. Attentional modulation of emotional stimulus processing in patients with major depression--alterations in prefrontal cortical regions. *Neuroscience letters*. 2009;463(2):108-13.
12. Bremner JD, Narayan M, Staib LH, Southwick SM, McGlashan T, Charney DS. Neural correlates of memories of childhood sexual abuse in women with and without

- posttraumatic stress disorder. *The American journal of psychiatry*. 1999;156(11):1787-95.
13. Bremner JD, Staib LH, Kaloupek D, Southwick SM, Soufer R, Charney DS. Neural correlates of exposure to traumatic pictures and sound in Vietnam combat veterans with and without posttraumatic stress disorder: a positron emission tomography study. *Biological psychiatry*. 1999;45(7):806-16.
  14. Bremner JD, Vermetten E, Schmahl C, Vaccarino V, Vythilingam M, Afzal N, et al. Positron emission tomographic imaging of neural correlates of a fear acquisition and extinction paradigm in women with childhood sexual-abuse-related post-traumatic stress disorder. *Psychological medicine*. 2005;35(6):791-806.
  15. Bremner JD, Vermetten E, Vythilingam M, Afzal N, Schmahl C, Elzinga B, et al. Neural correlates of the classic color and emotional stroop in women with abuse-related posttraumatic stress disorder. *Biological psychiatry*. 2004;55(6):612-20.
  16. Bremner JD, Vythilingam M, Vermetten E, Charney DS. Effects of antidepressant treatment on neural correlates of emotional and neutral declarative verbal memory in depression. *Journal of affective disorders*. 2007;101(1-3):99-111.
  17. Bremner JD, Vythilingam M, Vermetten E, Southwick SM, McGlashan T, Staib LH, et al. Neural correlates of declarative memory for emotionally valenced words in women with posttraumatic stress disorder related to early childhood sexual abuse. *Biological psychiatry*. 2003;53(10):879-89.
  18. Briceno EM, Rapport LJ, Kassel MT, Bieliauskas LA, Zubieta JK, Weisenbach SL, et al. Age and gender modulate the neural circuitry supporting facial emotion processing in adults with major depressive disorder. *Am J Geriatr Psychiatry*. 2015;23(3):304-13.
  19. Briceno EM, Weisenbach SL, Rapport LJ, Hazlett KE, Bieliauskas LA, Haase BD, et al. Shifted inferior frontal laterality in women with major depressive disorder is related to emotion-processing deficits. *Psychological medicine*. 2013;43(7):1433-45.
  20. Britton JC, Gold AL, Deckersbach T, Rauch SL. Functional MRI study of specific animal phobia using an event-related emotional counting stroop paradigm. *Depression and anxiety*. 2009;26(9):796-805.
  21. Bruhl AB, Rufer M, Delsignore A, Kaffenberger T, Jancke L, Herwig U. Neural correlates of altered general emotion processing in social anxiety disorder. *Brain research*. 2011;1378:72-83.
  22. Burger C, Redlich R, Grotegerd D, Meinert S, Dohm K, Schneider I, et al. Differential Abnormal Pattern of Anterior Cingulate Gyrus Activation in Unipolar and Bipolar Depression: an fMRI and Pattern Classification Approach. *Neuropsychopharmacology : official publication of the American College of Neuropsychopharmacology*. 2017;42(7):1399-408.
  23. Burkhouse KL, Jacobs RH, Peters AT, Ajilore O, Watkins ER, Langenecker SA. Neural correlates of rumination in adolescents with remitted major depressive disorder and healthy controls. *Cogn Affect Behav Neurosci*. 2017;17(2):394-405.
  24. Canli T, Sivers H, Thomason ME, Whitfield-Gabrieli S, Gabrieli JD, Gotlib IH. Brain activation to emotional words in depressed vs healthy subjects. *Neuroreport*. 2004;15(17):2585-8.
  25. Cardoner N, Harrison BJ, Pujol J, Soriano-Mas C, Hernandez-Ribas R, Lopez-Sola M, et al. Enhanced brain responsiveness during active emotional face processing

- in obsessive compulsive disorder. *The world journal of biological psychiatry : the official journal of the World Federation of Societies of Biological Psychiatry*. 2011;12(5):349-63.
26. Caseras X, Lawrence NS, Murphy K, Wise RG, Phillips ML. Ventral striatum activity in response to reward: differences between bipolar I and II disorders. *The American journal of psychiatry*. 2013;170(5):533-41.
  27. Caseras X, Mataix-Cols D, Trasovares MV, Lopez-Sola M, Ortriz H, Pujol J, et al. Dynamics of brain responses to phobic-related stimulation in specific phobia subtypes. *Eur J Neurosci*. 2010;32(8):1414-22.
  28. Cerullo MA, Eliassen JC, Smith CT, Fleck DE, Nelson EB, Strawn JR, et al. Bipolar I disorder and major depressive disorder show similar brain activation during depression. *Bipolar disorders*. 2014;16(7):703-12.
  29. Chang K, Adleman NE, Dienes K, Simeonova DI, Menon V, Reiss A. Anomalous prefrontal-subcortical activation in familial pediatric bipolar disorder: a functional magnetic resonance imaging investigation. *Archives of general psychiatry*. 2004;61(8):781-92.
  30. Charlet K, Schlagenhaut F, Richter A, Naundorf K, Dornhof L, Weinfurter CE, et al. Neural activation during processing of aversive faces predicts treatment outcome in alcoholism. *Addiction biology*. 2014;19(3):439-51.
  31. Chechko N, Kellermann T, Augustin M, Zvyagintsev M, Schneider F, Habel U. Disorder-specific characteristics of borderline personality disorder with co-occurring depression and its comparison with major depression: An fMRI study with emotional interference task. *Neuroimage Clin*. 2016;12:517-25.
  32. Chen CH, Lennox B, Jacob R, Calder A, Lupson V, Bisbrown-Chippendale R, et al. Explicit and implicit facial affect recognition in manic and depressed States of bipolar disorder: a functional magnetic resonance imaging study. *Biological psychiatry*. 2006;59(1):31-9.
  33. Colich NL, Foland-Ross LC, Eggleston C, Singh MK, Gotlib IH. Neural Aspects of Inhibition Following Emotional Primes in Depressed Adolescents. *J Clin Child Adolesc Psychol*. 2016;45(1):21-30.
  34. Cooney RE, Joormann J, Eugene F, Dennis EL, Gotlib IH. Neural correlates of rumination in depression. *Cogn Affect Behav Neurosci*. 2010;10(4):470-8.
  35. Demenescu LR, Renken R, Kortekaas R, van Tol MJ, Marsman JB, van Buchem MA, et al. Neural correlates of perception of emotional facial expressions in out-patients with mild-to-moderate depression and anxiety. A multicenter fMRI study. *Psychological medicine*. 2011;41(11):2253-64.
  36. Derntl B, Finkelmeyer A, Voss B, Eickhoff SB, Kellermann T, Schneider F, et al. Neural correlates of the core facets of empathy in schizophrenia. *Schizophrenia research*. 2012;136(1-3):70-81.
  37. Derntl B, Seidel EM, Eickhoff SB, Kellermann T, Gur RC, Schneider F, et al. Neural correlates of social approach and withdrawal in patients with major depression. *Soc Neurosci*. 2011;6(5-6):482-501.
  38. Deveney CM, Brotman MA, Thomas LA, Hinton KE, Muhrer EM, Reynolds RC, et al. Neural response during explicit and implicit face processing varies developmentally in bipolar disorder. *Soc Cogn Affect Neurosci*. 2014;9(12):1984-92.

39. Diaconescu AO, Jensen J, Wang H, Willeit M, Menon M, Kapur S, et al. Aberrant Effective Connectivity in Schizophrenia Patients during Appetitive Conditioning. *Front Hum Neurosci*. 2011;4:239.
40. Dichter GS, Felder JN, Smoski MJ. Affective context interferes with cognitive control in unipolar depression: an fMRI investigation. *Journal of affective disorders*. 2009;114(1-3):131-42.
41. Diler RS, Ladouceur CD, Segreti A, Almeida JR, Birmaher B, Axelson DA, et al. Neural correlates of treatment response in depressed bipolar adolescents during emotion processing. *Brain Imaging Behav*. 2013;7(2):227-35.
42. Dilger S, Straube T, Mentzel HJ, Fitzek C, Reichenbach JR, Hecht H, et al. Brain activation to phobia-related pictures in spider phobic humans: an event-related functional magnetic resonance imaging study. *Neuroscience letters*. 2003;348(1):29-32.
43. Dowd EC, Barch DM. Pavlovian reward prediction and receipt in schizophrenia: relationship to anhedonia. *PLoS One*. 2012;7(5):e35622.
44. Dyck M, Loughhead J, Gur RC, Schneider F, Mathiak K. Hyperactivation balances sensory processing deficits during mood induction in schizophrenia. *Soc Cogn Affect Neurosci*. 2014;9(2):167-75.
45. Elliott R, Ogilvie A, Rubinsztein JS, Calderon G, Dolan RJ, Sahakian BJ. Abnormal ventral frontal response during performance of an affective go/no go task in patients with mania. *Biological psychiatry*. 2004;55(12):1163-70.
46. Elliott R, Rubinsztein JS, Sahakian BJ, Dolan RJ. The neural basis of mood-congruent processing biases in depression. *Archives of general psychiatry*. 2002;59(7):597-604.
47. Enzi B, Lissek S, Edel MA, Tegenthoff M, Nicolas V, Scherbaum N, et al. Alterations of monetary reward and punishment processing in chronic cannabis users: an FMRI study. *PLoS One*. 2015;10(3):e0119150.
48. Epstein J, Pan H, Kocsis JH, Yang Y, Butler T, Chusid J, et al. Lack of ventral striatal response to positive stimuli in depressed versus normal subjects. *The American journal of psychiatry*. 2006;163(10):1784-90.
49. Evans KC, Wright CI, Wedig MM, Gold AL, Pollack MH, Rauch SL. A functional MRI study of amygdala responses to angry schematic faces in social anxiety disorder. *Depression and anxiety*. 2008;25(6):496-505.
50. Favre P, Baciuc M, Pichat C, De Pourtales MA, Fredembach B, Garcon S, et al. Modulation of fronto-limbic activity by the psychoeducation in euthymic bipolar patients. A functional MRI study. *Psychiatry research*. 2013;214(3):285-95.
51. Favre P, Polosan M, Pichat C, Bougerol T, Baciuc M. Cerebral Correlates of Abnormal Emotion Conflict Processing in Euthymic Bipolar Patients: A Functional MRI Study. *PLoS One*. 2015;10(8):e0134961.
52. Feeser M, Schlagenhaut F, Sterzer P, Park S, Stoy M, Gutwinski S, et al. Context insensitivity during positive and negative emotional expectancy in depression assessed with functional magnetic resonance imaging. *Psychiatry research*. 2013;212(1):28-35.
53. Feldker K, Heitmann CY, Neumeister P, Bruchmann M, Vibrans L, Zwitserlood P, et al. Brain responses to disorder-related visual threat in panic disorder. *Hum Brain Mapp*. 2016;37(12):4439-53.

54. Fitzgerald JM, Phan KL, Kennedy AE, Shankman SA, Langenecker SA, Klumpp H. Prefrontal and amygdala engagement during emotional reactivity and regulation in generalized anxiety disorder. *Journal of affective disorders*. 2017;218:398-406.
55. Foland LC, Altshuler LL, Bookheimer SY, Eisenberger N, Townsend J, Thompson PM. Evidence for deficient modulation of amygdala response by prefrontal cortex in bipolar mania. *Psychiatry research*. 2008;162(1):27-37.
56. Foland-Ross LC, Bookheimer SY, Lieberman MD, Sugar CA, Townsend JD, Fischer J, et al. Normal amygdala activation but deficient ventrolateral prefrontal activation in adults with bipolar disorder during euthymia. *NeuroImage*. 2012;59(1):738-44.
57. Foland-Ross LC, Cooney RE, Joormann J, Henry ML, Gotlib IH. Recalling happy memories in remitted depression: a neuroimaging investigation of the repair of sad mood. *Cogn Affect Behav Neurosci*. 2014;14(2):818-26.
58. Fonzo GA, Ramsawh HJ, Flagan TM, Sullivan SG, Simmons AN, Paulus MP, et al. Cognitive-behavioral therapy for generalized anxiety disorder is associated with attenuation of limbic activation to threat-related facial emotions. *Journal of affective disorders*. 2014;169:76-85.
59. Fournier JC, Keener MT, Almeida J, Kronhaus DM, Phillips ML. Amygdala and whole-brain activity to emotional faces distinguishes major depressive disorder and bipolar disorder. *Bipolar disorders*. 2013;15(7):741-52.
60. Fournier JC, Keener MT, Mullin BC, Hafeman DM, Labarbara EJ, Stiffler RS, et al. Heterogeneity of amygdala response in major depressive disorder: the impact of lifetime subthreshold mania. *Psychological medicine*. 2013;43(2):293-302.
61. Frodl T, Scheuerecker J, Albrecht J, Kleemann AM, Muller-Schunk S, Koutsouleris N, et al. Neuronal correlates of emotional processing in patients with major depression. *The world journal of biological psychiatry : the official journal of the World Federation of Societies of Biological Psychiatry*. 2009;10(3):202-8.
62. Fu CH, Costafreda SG, Sankar A, Adams TM, Rasenick MM, Liu P, et al. Multimodal functional and structural neuroimaging investigation of major depressive disorder following treatment with duloxetine. *BMC Psychiatry*. 2015;15:82.
63. Fu CH, Williams SC, Brammer MJ, Suckling J, Kim J, Cleare AJ, et al. Neural responses to happy facial expressions in major depression following antidepressant treatment. *The American journal of psychiatry*. 2007;164(4):599-607.
64. Fu CH, Williams SC, Cleare AJ, Brammer MJ, Walsh ND, Kim J, et al. Attenuation of the neural response to sad faces in major depression by antidepressant treatment: a prospective, event-related functional magnetic resonance imaging study. *Archives of general psychiatry*. 2004;61(9):877-89.
65. Gaebler M, Daniels JK, Lamke JP, Fydrich T, Walter H. Behavioural and neural correlates of self-focused emotion regulation in social anxiety disorder. *J Psychiatry Neurosci*. 2014;39(4):249-58.
66. Garfinkel SN, Abelson JL, King AP, Sripada RK, Wang X, Gaines LM, et al. Impaired contextual modulation of memories in PTSD: an fMRI and psychophysiological study of extinction retention and fear renewal. *The Journal of neuroscience : the official journal of the Society for Neuroscience*. 2014;34(40):13435-43.
67. Gentili C, Gobbi MI, Ricciardi E, Vanello N, Pietrini P, Haxby JV, et al. Differential modulation of neural activity throughout the distributed neural system for

- face perception in patients with Social Phobia and healthy subjects. *Brain research bulletin*. 2008;77(5):286-92.
68. Gilman JM, Hommer DW. Modulation of brain response to emotional images by alcohol cues in alcohol-dependent patients. *Addiction biology*. 2008;13(3-4):423-34.
69. Goldin PR, Manber T, Hakimi S, Canli T, Gross JJ. Neural bases of social anxiety disorder: emotional reactivity and cognitive regulation during social and physical threat. *Archives of general psychiatry*. 2009;66(2):170-80.
70. Goncalves OF, Soares JM, Carvalho S, Leite J, Ganho A, Fernandes-Goncalves A, et al. Brain activation of the defensive and appetitive survival systems in obsessive compulsive disorder. *Brain Imaging Behav*. 2015;9(2):255-63.
71. Goossens L, Schruers K, Peeters R, Griez E, Sunaert S. Visual presentation of phobic stimuli: amygdala activation via an extrageniculostriate pathway? *Psychiatry research*. 2007;155(2):113-20.
72. Gotlib IH, Sivers H, Gabrieli JD, Whitfield-Gabrieli S, Goldin P, Minor KL, et al. Subgenual anterior cingulate activation to valenced emotional stimuli in major depression. *Neuroreport*. 2005;16(16):1731-4.
73. Gradin VB, Perez A, Macfarlane JA, Cavin I, Waiter G, Tone EB, et al. Neural correlates of social exchanges during the Prisoner's Dilemma game in depression. *Psychological medicine*. 2016;46(6):1289-300.
74. Gradin VB, Waiter G, O'Connor A, Romaniuk L, Stickle C, Matthews K, et al. Salience network-midbrain dysconnectivity and blunted reward signals in schizophrenia. *Psychiatry research*. 2013;211(2):104-11.
75. Greening SG, Osuch EA, Williamson PC, Mitchell DG. Emotion-related brain activity to conflicting socio-emotional cues in unmedicated depression. *Journal of affective disorders*. 2013;150(3):1136-41.
76. Greening SG, Osuch EA, Williamson PC, Mitchell DG. The neural correlates of regulating positive and negative emotions in medication-free major depression. *Soc Cogn Affect Neurosci*. 2014;9(5):628-37.
77. Grimm S, Boesiger P, Beck J, Schuepbach D, Birmohl F, Walter M, et al. Altered negative BOLD responses in the default-mode network during emotion processing in depressed subjects. *Neuropsychopharmacology : official publication of the American College of Neuropsychopharmacology*. 2009;34(4):932-43.
78. Gruber SA, Rogowska J, Yurgelun-Todd DA. Altered affective response in marijuana smokers: an fMRI study. *Drug and alcohol dependence*. 2009;105(1-2):139-53.
79. Guimond S, Padani S, Lutz O, Eack S, Thermenos H, Keshavan M. Impaired regulation of emotional distractors during working memory load in schizophrenia. *Journal of psychiatric research*. 2018;101:14-20.
80. Gur RE, Loughhead J, Kohler CG, Elliott MA, Lesko K, Ruparel K, et al. Limbic activation associated with misidentification of fearful faces and flat affect in schizophrenia. *Archives of general psychiatry*. 2007;64(12):1356-66.
81. Habel U, Chechko N, Pauly K, Koch K, Backes V, Seiferth N, et al. Neural correlates of emotion recognition in schizophrenia. *Schizophrenia research*. 2010;122(1-3):113-23.
82. Habel U, Pauly K, Koch K, Kellermann T, Reske M, Backes V, et al. Emotion-cognition interactions in schizophrenia. *The world journal of biological psychiatry : the*

official journal of the World Federation of Societies of Biological Psychiatry. 2010;11(8):934-44.

83. Hafeman DM, Bebko G, Bertocci MA, Fournier JC, Bonar L, Perlman SB, et al. Abnormal deactivation of the inferior frontal gyrus during implicit emotion processing in youth with bipolar disorder: attenuated by medication. *Journal of psychiatric research*. 2014;58:129-36.
84. Hall J, Whalley HC, McKirdy JW, Romaniuk L, McGonigle D, McIntosh AM, et al. Overactivation of fear systems to neutral faces in schizophrenia. *Biological psychiatry*. 2008;64(1):70-3.
85. Han HJ, Jung WH, Yun JY, Park JW, Cho KK, Hur JW, et al. Disruption of effective connectivity from the dorsolateral prefrontal cortex to the orbitofrontal cortex by negative emotional distraction in obsessive-compulsive disorder. *Psychological medicine*. 2016;46(5):921-32.
86. Hassel S, Almeida JR, Kerr N, Nau S, Ladouceur CD, Fissell K, et al. Elevated striatal and decreased dorsolateral prefrontal cortical activity in response to emotional stimuli in euthymic bipolar disorder: no associations with psychotropic medication load. *Bipolar disorders*. 2008;10(8):916-27.
87. Heinz A, Wrase J, Kahnt T, Beck A, Bromand Z, Grusser SM, et al. Brain activation elicited by affectively positive stimuli is associated with a lower risk of relapse in detoxified alcoholic subjects. *Alcoholism, clinical and experimental research*. 2007;31(7):1138-47.
88. Heitmann CY, Feldker K, Neumeister P, Brinkmann L, Schrammen E, Zwitserlood P, et al. Brain activation to task-irrelevant disorder-related threat in social anxiety disorder: The impact of symptom severity. *Neuroimage Clin*. 2017;14:323-33.
89. Heller AS, Johnstone T, Shackman AJ, Light SN, Peterson MJ, Kolden GG, et al. Reduced capacity to sustain positive emotion in major depression reflects diminished maintenance of fronto-striatal brain activation. *Proc Natl Acad Sci U S A*. 2009;106(52):22445-50.
90. Henderson SE, Vallejo AI, Ely BA, Kang G, Krain Roy A, Pine DS, et al. The neural correlates of emotional face-processing in adolescent depression: a dimensional approach focusing on anhedonia and illness severity. *Psychiatry research*. 2014;224(3):234-41.
91. Henje Blom E, Connolly CG, Ho TC, LeWinn KZ, Mobayed N, Han L, et al. Altered insular activation and increased insular functional connectivity during sad and happy face processing in adolescent major depressive disorder. *Journal of affective disorders*. 2015;178:215-23.
92. Herold D, Usnich T, Spengler S, Sajonz B, Bauer M, Bempohl F. Decreased medial prefrontal cortex activation during self-referential processing in bipolar mania. *Journal of affective disorders*. 2017;219:157-63.
93. Hilbert K, Evens R, Maslowski NI, Wittchen HU, Lueken U. Fear processing in dental phobia during crossmodal symptom provocation: an fMRI study. *Biomed Res Int*. 2014;2014:196353.
94. Holt DJ, Coombs G, Zeidan MA, Goff DC, Milad MR. Failure of neural responses to safety cues in schizophrenia. *Archives of general psychiatry*. 2012;69(9):893-903.



95. Holt DJ, Lakshmanan B, Freudenreich O, Goff DC, Rauch SL, Kuperberg GR. Dysfunction of a cortical midline network during emotional appraisals in schizophrenia. *Schizophr Bull.* 2011;37(1):164-76.
96. Horga G, Fernandez-Egea E, Mane A, Font M, Schatz KC, Falcon C, et al. Brain metabolism during hallucination-like auditory stimulation in schizophrenia. *PLoS One.* 2014;9(1):e84987.
97. Hou C, Liu J, Wang K, Li L, Liang M, He Z, et al. Brain responses to symptom provocation and trauma-related short-term memory recall in coal mining accident survivors with acute severe PTSD. *Brain research.* 2007;1144:165-74.
98. Jogia J, Haldane M, Cobb A, Kumari V, Frangou S. Pilot investigation of the changes in cortical activation during facial affect recognition with lamotrigine monotherapy in bipolar disorder. *The British journal of psychiatry : the journal of mental science.* 2008;192(3):197-201.
99. Johnstone T, van Reekum CM, Urry HL, Kalin NH, Davidson RJ. Failure to regulate: counterproductive recruitment of top-down prefrontal-subcortical circuitry in major depression. *The Journal of neuroscience : the official journal of the Society for Neuroscience.* 2007;27(33):8877-84.
100. Jollant F, Lawrence NS, Giampietro V, Brammer MJ, Fullana MA, Drapier D, et al. Orbitofrontal cortex response to angry faces in men with histories of suicide attempts. *The American journal of psychiatry.* 2008;165(6):740-8.
101. Jung WH, Kang DH, Han JY, Jang JH, Gu BM, Choi JS, et al. Aberrant ventral striatal responses during incentive processing in unmedicated patients with obsessive-compulsive disorder. *Acta Psychiatr Scand.* 2011;123(5):376-86.
102. Kang JI, Kim JJ, Seok JH, Chun JW, Lee SK, Park HJ. Abnormal brain response during the auditory emotional processing in schizophrenic patients with chronic auditory hallucinations. *Schizophrenia research.* 2009;107(1):83-91.
103. Keedwell PA, Andrew C, Williams SC, Brammer MJ, Phillips ML. A double dissociation of ventromedial prefrontal cortical responses to sad and happy stimuli in depressed and healthy individuals. *Biological psychiatry.* 2005;58(6):495-503.
104. Keener MT, Fournier JC, Mullin BC, Kronhaus D, Perlman SB, LaBarbara E, et al. Dissociable patterns of medial prefrontal and amygdala activity to face identity versus emotion in bipolar disorder. *Psychological medicine.* 2012;42(9):1913-24.
105. Killgore WD, Gruber SA, Yurgelun-Todd DA. Abnormal corticostriatal activity during fear perception in bipolar disorder. *Neuroreport.* 2008;19(15):1523-7.
106. Kim E, Jung YC, Ku J, Kim JJ, Lee H, Kim SY, et al. Reduced activation in the mirror neuron system during a virtual social cognition task in euthymic bipolar disorder. *Prog Neuropsychopharmacol Biol Psychiatry.* 2009;33(8):1409-16.
107. Kim GW, Yang JC, Jeong GW. Emotional effect on cognitive control in implicit memory tasks in patients with schizophrenia. *Neuroreport.* 2015;26(11):647-55.
108. Klumpp H, Post D, Angstadt M, Fitzgerald DA, Phan KL. Anterior cingulate cortex and insula response during indirect and direct processing of emotional faces in generalized social anxiety disorder. *Biol Mood Anxiety Disord.* 2013;3:7.
109. Knutson B, Bhanji JP, Cooney RE, Atlas LY, Gotlib IH. Neural responses to monetary incentives in major depression. *Biological psychiatry.* 2008;63(7):686-92.

110. Kumari V, Mitterschiffthaler MT, Teasdale JD, Malhi GS, Brown RG, Giampietro V, et al. Neural abnormalities during cognitive generation of affect in treatment-resistant depression. *Biological psychiatry*. 2003;54(8):777-91.
111. Lagopoulos J, Malhi GS. A functional magnetic resonance imaging study of emotional Stroop in euthymic bipolar disorder. *Neuroreport*. 2007;18(15):1583-7.
112. Lakis N, Jimenez JA, Mancini-Marie A, Stip E, Lavoie ME, Mendrek A. Neural correlates of emotional recognition memory in schizophrenia: effects of valence and arousal. *Psychiatry research*. 2011;194(3):245-56.
113. Lakis N, Mendrek A. Individuals diagnosed with schizophrenia assign emotional importance to neutral stimuli: an fMRI study. *ISRN Psychiatry*. 2013;2013:965428.
114. Lanius RA, Williamson PC, Boksman K, Densmore M, Gupta M, Neufeld RW, et al. Brain activation during script-driven imagery induced dissociative responses in PTSD: a functional magnetic resonance imaging investigation. *Biological psychiatry*. 2002;52(4):305-11.
115. Lanius RA, Williamson PC, Densmore M, Boksman K, Gupta MA, Neufeld RW, et al. Neural correlates of traumatic memories in posttraumatic stress disorder: a functional MRI investigation. *The American journal of psychiatry*. 2001;158(11):1920-2.
116. Lanius RA, Williamson PC, Hopper J, Densmore M, Boksman K, Gupta MA, et al. Recall of emotional states in posttraumatic stress disorder: an fMRI investigation. *Biological psychiatry*. 2003;53(3):204-10.
117. Lee JS, Chun JW, Yoon SY, Park HJ, Kim JJ. Involvement of the mirror neuron system in blunted affect in schizophrenia. *Schizophrenia research*. 2014;152(1):268-74.
118. Lee SK, Chun JW, Lee JS, Park HJ, Jung YC, Seok JH, et al. Abnormal neural processing during emotional salience attribution of affective asymmetry in patients with schizophrenia. *PLoS One*. 2014;9(3):e90792.
119. Lennox BR, Jacob R, Calder AJ, Lupson V, Bullmore ET. Behavioural and neurocognitive responses to sad facial affect are attenuated in patients with mania. *Psychological medicine*. 2004;34(5):795-802.
120. Lepage M, Sergerie K, Benoit A, Czechowska Y, Dickie E, Armony JL. Emotional face processing and flat affect in schizophrenia: functional and structural neural correlates. *Psychological medicine*. 2011;41(9):1833-44.
121. Li HJ, Chan RC, Gong QY, Liu Y, Liu SM, Shum D, et al. Facial emotion processing in patients with schizophrenia and their non-psychotic siblings: a functional magnetic resonance imaging study. *Schizophrenia research*. 2012;134(2-3):143-50.
122. Li Y, Li M, Wei D, Kong X, Du X, Hou X, et al. Self-referential processing in unipolar depression: Distinct roles of subregions of the medial prefrontal cortex. *Psychiatry research*. 2017;263:8-14.
123. Lindauer RJ, Booij J, Habraken JB, Uylings HB, Olf M, Carlier IV, et al. Cerebral blood flow changes during script-driven imagery in police officers with posttraumatic stress disorder. *Biological psychiatry*. 2004;56(11):853-61.
124. Lindner C, Dannlowski U, Walhofer K, Rodiger M, Maisch B, Bauer J, et al. Social alienation in schizophrenia patients: association with insula responsiveness to facial expressions of disgust. *PLoS One*. 2014;9(1):e85014.
125. Linnman C, Coombs G, 3rd, Goff DC, Holt DJ. Lack of insula reactivity to aversive stimuli in schizophrenia. *Schizophrenia research*. 2013;143(1):150-7.

126. Liu J, Blond BN, van Dyck LI, Spencer L, Wang F, Blumberg HP. Trait and state corticostriatal dysfunction in bipolar disorder during emotional face processing. *Bipolar disorders*. 2012;14(4):432-41.
127. Lorberbaum JP, Kose S, Johnson MR, Arana GW, Sullivan LK, Hamner MB, et al. Neural correlates of speech anticipatory anxiety in generalized social phobia. *Neuroreport*. 2004;15(18):2701-5.
128. Lueken U, Straube B, Reinhardt I, Maslowski NI, Wittchen HU, Strohle A, et al. Altered top-down and bottom-up processing of fear conditioning in panic disorder with agoraphobia. *Psychological medicine*. 2014;44(2):381-94.
129. Maddock RJ, Buonocore MH, Kile SJ, Garrett AS. Brain regions showing increased activation by threat-related words in panic disorder. *Neuroreport*. 2003;14(3):325-8.
130. Malhi GS, Lagopoulos J, Owen AM, Ivanovski B, Shnier R, Sachdev P. Reduced activation to implicit affect induction in euthymic bipolar patients: an fMRI study. *Journal of affective disorders*. 2007;97(1-3):109-22.
131. Malhi GS, Lagopoulos J, Sachdev PS, Ivanovski B, Shnier R. An emotional Stroop functional MRI study of euthymic bipolar disorder. *Bipolar disorders*. 2005;7 Suppl 5:58-69.
132. Malhi GS, Lagopoulos J, Sachdev PS, Ivanovski B, Shnier R, Ketter T. Is a lack of disgust something to fear? A functional magnetic resonance imaging facial emotion recognition study in euthymic bipolar disorder patients. *Bipolar disorders*. 2007;9(4):345-57.
133. Marchand WR, Lee JN, Garn C, Thatcher J, Gale P, Kreitschitz S, et al. Aberrant emotional processing in posterior cortical midline structures in bipolar II depression. *Prog Neuropsychopharmacol Biol Psychiatry*. 2011;35(7):1729-37.
134. Mataix-Cols D, Wooderson S, Lawrence N, Brammer MJ, Speckens A, Phillips ML. Distinct neural correlates of washing, checking, and hoarding symptom dimensions in obsessive-compulsive disorder. *Archives of general psychiatry*. 2004;61(6):564-76.
135. May AC, Stewart JL, Migliorini R, Tapert SF, Paulus MP. Methamphetamine dependent individuals show attenuated brain response to pleasant interoceptive stimuli. *Drug and alcohol dependence*. 2013;131(3):238-46.
136. Mazza M, Tempesta D, Pino MC, Catalucci A, Gallucci M, Ferrara M. Regional cerebral changes and functional connectivity during the observation of negative emotional stimuli in subjects with post-traumatic stress disorder. *European archives of psychiatry and clinical neuroscience*. 2013;263(7):575-83.
137. Mendrek A, Bourque J, Dube A, Lakis N, Champagne J. Emotion processing in women with schizophrenia is menstrual cycle phase and affective valence dependent: an fMRI study. *ISRN Psychiatry*. 2012;2012:656274.
138. Michalopoulou PG, Surguladze S, Morley LA, Giampietro VP, Murray RM, Shergill SS. Facial fear processing and psychotic symptoms in schizophrenia: functional magnetic resonance imaging study. *The British journal of psychiatry : the journal of mental science*. 2008;192(3):191-6.
139. Mier D, Lis S, Zygodnik K, Sauer C, Ulferts J, Gallhofer B, et al. Evidence for altered amygdala activation in schizophrenia in an adaptive emotion recognition task. *Psychiatry research*. 2014;221(3):195-203.

140. Milad MR, Furtak SC, Greenberg JL, Keshaviah A, Im JJ, Falkenstein MJ, et al. Deficits in conditioned fear extinction in obsessive-compulsive disorder and neurobiological changes in the fear circuit. *JAMA Psychiatry*. 2013;70(6):608-18; quiz 554.
141. Milad MR, Pitman RK, Ellis CB, Gold AL, Shin LM, Lasko NB, et al. Neurobiological basis of failure to recall extinction memory in posttraumatic stress disorder. *Biological psychiatry*. 2009;66(12):1075-82.
142. Mingtian Z, Shuqiao Y, Xiongzhao Z, Jinyao Y, Xueling Z, Xiang W, et al. Elevated amygdala activity to negative faces in young adults with early onset major depressive disorder. *Psychiatry research*. 2012;201(2):107-12.
143. Mitchell RL, Elliott R, Barry M, Cruttenden A, Woodruff PW. Neural response to emotional prosody in schizophrenia and in bipolar affective disorder. *The British journal of psychiatry : the journal of mental science*. 2004;184:223-30.
144. Mitterschiffthaler MT, Kumari V, Malhi GS, Brown RG, Giampietro VP, Brammer MJ, et al. Neural response to pleasant stimuli in anhedonia: an fMRI study. *Neuroreport*. 2003;14(2):177-82.
145. Mitterschiffthaler MT, Williams SC, Walsh ND, Cleare AJ, Donaldson C, Scott J, et al. Neural basis of the emotional Stroop interference effect in major depression. *Psychological medicine*. 2008;38(2):247-56.
146. Moeller SJ, Konova AB, Parvaz MA, Tomasi D, Lane RD, Fort C, et al. Functional, structural, and emotional correlates of impaired insight in cocaine addiction. *JAMA Psychiatry*. 2014;71(1):61-70.
147. Monk CS, Telzer EH, Mogg K, Bradley BP, Mai X, Louro HM, et al. Amygdala and ventrolateral prefrontal cortex activation to masked angry faces in children and adolescents with generalized anxiety disorder. *Archives of general psychiatry*. 2008;65(5):568-76.
148. Moon CM, Jeong GW. Functional neuroanatomy on the working memory under emotional distraction in patients with generalized anxiety disorder. *Psychiatry Clin Neurosci*. 2015;69(10):609-19.
149. Moon CM, Sundaram T, Choi NG, Jeong GW. Working memory dysfunction associated with brain functional deficits and cellular metabolic changes in patients with generalized anxiety disorder. *Psychiatry research*. 2016;254:137-44.
150. Moon CM, Yang JC, Jeong GW. Explicit verbal memory impairments associated with brain functional deficits and morphological alterations in patients with generalized anxiety disorder. *Journal of affective disorders*. 2015;186:328-36.
151. Moon CM, Yang JC, Jeong GW. Functional neuroanatomy associated with the interaction between emotion and cognition in explicit memory tasks in patients with generalized anxiety disorder. *Acta Radiol*. 2017;58(1):98-106.
152. Morris RW, Sparks A, Mitchell PB, Weickert CS, Green MJ. Lack of cortico-limbic coupling in bipolar disorder and schizophrenia during emotion regulation. *Translational psychiatry*. 2012;2:e90.
153. Mothersill O, Morris DW, Kelly S, Rose EJ, Bokde A, Reilly R, et al. Altered medial prefrontal activity during dynamic face processing in schizophrenia spectrum patients. *Schizophrenia research*. 2014;157(1-3):225-30.

154. Murray GK, Corlett PR, Clark L, Pessiglione M, Blackwell AD, Honey G, et al. Substantia nigra/ventral tegmental reward prediction error disruption in psychosis. *Molecular psychiatry*. 2008;13(3):239, 67-76.
155. Murrrough JW, Collins KA, Fields J, DeWilde KE, Phillips ML, Mathew SJ, et al. Regulation of neural responses to emotion perception by ketamine in individuals with treatment-resistant major depressive disorder. *Translational psychiatry*. 2015;5:e509.
156. Nilsen AS, Blix I, Leknes S, Ekeberg O, Skogstad L, Endestad T, et al. Brain Activity in Response to Trauma-specific, Negative, and Neutral Stimuli. A fMRI Study of Recent Road Traffic Accident Survivors. *Front Psychol*. 2016;7:1173.
157. Nusslock R, Almeida JR, Forbes EE, Versace A, Frank E, Labarbara EJ, et al. Waiting to win: elevated striatal and orbitofrontal cortical activity during reward anticipation in euthymic bipolar disorder adults. *Bipolar disorders*. 2012;14(3):249-60.
158. Oh J, Chun JW, Joon Jo H, Kim E, Park HJ, Lee B, et al. The neural basis of a deficit in abstract thinking in patients with schizophrenia. *Psychiatry research*. 2015;234(1):66-73.
159. Palm ME, Elliott R, McKie S, Deakin JF, Anderson IM. Attenuated responses to emotional expressions in women with generalized anxiety disorder. *Psychological medicine*. 2011;41(5):1009-18.
160. Paradiso S, Andreasen NC, Crespo-Facorro B, O'Leary DS, Watkins GL, Boles Ponto LL, et al. Emotions in unmedicated patients with schizophrenia during evaluation with positron emission tomography. *The American journal of psychiatry*. 2003;160(10):1775-83.
161. Park KM, Kim JJ, Ku J, Kim SY, Lee HR, Kim SI, et al. Neural basis of attributional style in schizophrenia. *Neuroscience letters*. 2009;459(1):35-40.
162. Passarotti AM, Sweeney JA, Pavuluri MN. Differential engagement of cognitive and affective neural systems in pediatric bipolar disorder and attention deficit hyperactivity disorder. *J Int Neuropsychol Soc*. 2010;16(1):106-17.
163. Passarotti AM, Sweeney JA, Pavuluri MN. Emotion processing influences working memory circuits in pediatric bipolar disorder and attention-deficit/hyperactivity disorder. *Journal of the American Academy of Child and Adolescent Psychiatry*. 2010;49(10):1064-80.
164. Paulesu E, Sambugaro E, Torti T, Danelli L, Ferri F, Scialfa G, et al. Neural correlates of worry in generalized anxiety disorder and in normal controls: a functional MRI study. *Psychological medicine*. 2010;40(1):117-24.
165. Pauly K, Seiferth NY, Kellermann T, Backes V, Vloet TD, Shah NJ, et al. Cerebral dysfunctions of emotion-cognition interactions in adolescent-onset schizophrenia. *Journal of the American Academy of Child and Adolescent Psychiatry*. 2008;47(11):1299-310.
166. Pavuluri MN, O'Connor MM, Harral E, Sweeney JA. Affective neural circuitry during facial emotion processing in pediatric bipolar disorder. *Biological psychiatry*. 2007;62(2):158-67.
167. Pavuluri MN, Passarotti AM, Harral EM, Sweeney JA. An fMRI study of the neural correlates of incidental versus directed emotion processing in pediatric bipolar disorder. *Journal of the American Academy of Child and Adolescent Psychiatry*. 2009;48(3):308-19.

168. Payer DE, Lieberman MD, Monterosso JR, Xu J, Fong TW, London ED. Differences in cortical activity between methamphetamine-dependent and healthy individuals performing a facial affect matching task. *Drug and alcohol dependence*. 2008;93(1-2):93-102.
169. Payer DE, Nurmi EL, Wilson SA, McCracken JT, London ED. Effects of methamphetamine abuse and serotonin transporter gene variants on aggression and emotion-processing neurocircuitry. *Translational psychiatry*. 2012;2:e80.
170. Perlman SB, Fournier JC, Bebko G, Bertocci MA, Hinze AK, Bonar L, et al. Emotional face processing in pediatric bipolar disorder: evidence for functional impairments in the fusiform gyrus. *Journal of the American Academy of Child and Adolescent Psychiatry*. 2013;52(12):1314-25 e3.
171. Pinkham AE, Loughhead J, Ruparel K, Overton E, Gur RE, Gur RC. Abnormal modulation of amygdala activity in schizophrenia in response to direct- and averted-gaze threat-related facial expressions. *The American journal of psychiatry*. 2011;168(3):293-301.
172. Pizzagalli DA, Holmes AJ, Dillon DG, Goetz EL, Birk JL, Bogdan R, et al. Reduced caudate and nucleus accumbens response to rewards in unmedicated individuals with major depressive disorder. *The American journal of psychiatry*. 2009;166(6):702-10.
173. Plener PL, Bubalo N, Fladung AK, Ludolph AG, Lule D. Prone to excitement: adolescent females with Non-suicidal self-injury (NSSI) show altered cortical pattern to emotional and NSS-related material. *Psychiatry research*. 2012;203(2-3):146-52.
174. Potenza MN, Hong KI, Lacadie CM, Fulbright RK, Tuit KL, Sinha R. Neural correlates of stress-induced and cue-induced drug craving: influences of sex and cocaine dependence. *The American journal of psychiatry*. 2012;169(4):406-14.
175. Price RB, Eldreth DA, Mohlman J. Deficient prefrontal attentional control in late-life generalized anxiety disorder: an fMRI investigation. *Translational psychiatry*. 2011;1:e46.
176. Pujol J, Gimenez M, Ortiz H, Soriano-Mas C, Lopez-Sola M, Farre M, et al. Neural response to the observable self in social anxiety disorder. *Psychological medicine*. 2013;43(4):721-31.
177. Quevedo K, Harms M, Sauder M, Scott H, Mohamed S, Thomas KM, et al. The neurobiology of self face recognition among depressed adolescents. *Journal of affective disorders*. 2018;229:22-31.
178. Radke S, Hoffstaedter F, Loffler L, Kogler L, Schneider F, Blechert J, et al. Imaging the up's and down's of emotion regulation in lifetime depression. *Brain Imaging Behav*. 2018;12(1):156-67.
179. Reinecke A, Filippini N, Berna C, Western DG, Hanson B, Cooper MJ, et al. Effective emotion regulation strategies improve fMRI and ECG markers of psychopathology in panic disorder: implications for psychological treatment action. *Translational psychiatry*. 2015;5:e673.
180. Remijnse PL, Nielen MM, van Balkom AJ, Hendriks GJ, Hoogendijk WJ, Uylings HB, et al. Differential frontal-striatal and paralimbic activity during reversal learning in major depressive disorder and obsessive-compulsive disorder. *Psychological medicine*. 2009;39(9):1503-18.

181. Reske M, Kellermann T, Habel U, Jon Shah N, Backes V, von Wilmsdorff M, et al. Stability of emotional dysfunctions? A long-term fMRI study in first-episode schizophrenia. *Journal of psychiatric research*. 2007;41(11):918-27.
182. Rey G, Desseilles M, Favre S, Dayer A, Piguet C, Aubry JM, et al. Modulation of brain response to emotional conflict as a function of current mood in bipolar disorder: preliminary findings from a follow-up state-based fMRI study. *Psychiatry research*. 2014;223(2):84-93.
183. Ritchey M, Dolcos F, Eddington KM, Strauman TJ, Cabeza R. Neural correlates of emotional processing in depression: changes with cognitive behavioral therapy and predictors of treatment response. *Journal of psychiatric research*. 2011;45(5):577-87.
184. Rose EJ, Salmeron BJ, Ross TJ, Waltz J, Schweitzer JB, McClure SM, et al. Temporal difference error prediction signal dysregulation in cocaine dependence. *Neuropsychopharmacology : official publication of the American College of Neuropsychopharmacology*. 2014;39(7):1732-42.
185. Sakamoto H, Fukuda R, Okuaki T, Rogers M, Kasai K, Machida T, et al. Parahippocampal activation evoked by masked traumatic images in posttraumatic stress disorder: a functional MRI study. *NeuroImage*. 2005;26(3):813-21.
186. Samson AC, Meisenzahl E, Scheuerecker J, Rose E, Schoepf V, Wiesmann M, et al. Brain activation predicts treatment improvement in patients with major depressive disorder. *Journal of psychiatric research*. 2011;45(9):1214-22.
187. Scheuerecker J, Meisenzahl EM, Koutsouleris N, Roesner M, Schopf V, Linn J, et al. Orbitofrontal volume reductions during emotion recognition in patients with major depression. *J Psychiatry Neurosci*. 2010;35(5):311-20.
188. Schienle A, Schafer A, Hermann A, Rohrman S, Vaitl D. Symptom provocation and reduction in patients suffering from spider phobia: an fMRI study on exposure therapy. *European archives of psychiatry and clinical neuroscience*. 2007;257(8):486-93.
189. Schienle A, Schafer A, Walter B, Stark R, Vaitl D. Brain activation of spider phobics towards disorder-relevant, generally disgust- and fear-inducing pictures. *Neuroscience letters*. 2005;388(1):1-6.
190. Schienle A, Scharmuller W, Leutgeb V, Schafer A, Stark R. Sex differences in the functional and structural neuroanatomy of dental phobia. *Brain Struct Funct*. 2013;218(3):779-87.
191. Schlund MW, Verduzco G, Cataldo MF, Hoehn-Saric R. Generalized anxiety modulates frontal and limbic activation in major depression. *Behav Brain Funct*. 2012;8:8.
192. Seiferth NY, Pauly K, Kellermann T, Shah NJ, Ott G, Herpertz-Dahlmann B, et al. Neuronal correlates of facial emotion discrimination in early onset schizophrenia. *Neuropsychopharmacology : official publication of the American College of Neuropsychopharmacology*. 2009;34(2):477-87.
193. Seo D, Lacadie CM, Sinha R. Neural Correlates and Connectivity Underlying Stress-Related Impulse Control Difficulties in Alcoholism. *Alcoholism, clinical and experimental research*. 2016;40(9):1884-94.
194. Shapira NA, Liu Y, He AG, Bradley MM, Lessig MC, James GA, et al. Brain activation by disgust-inducing pictures in obsessive-compulsive disorder. *Biological psychiatry*. 2003;54(7):751-6.

195. Shin LM, McNally RJ, Kosslyn SM, Thompson WL, Rauch SL, Alpert NM, et al. Regional cerebral blood flow during script-driven imagery in childhood sexual abuse-related PTSD: A PET investigation. *The American journal of psychiatry*. 1999;156(4):575-84.
196. Shin LM, Orr SP, Carson MA, Rauch SL, Macklin ML, Lasko NB, et al. Regional cerebral blood flow in the amygdala and medial prefrontal cortex during traumatic imagery in male and female Vietnam veterans with PTSD. *Archives of general psychiatry*. 2004;61(2):168-76.
197. Shin LM, Whalen PJ, Pitman RK, Bush G, Macklin ML, Lasko NB, et al. An fMRI study of anterior cingulate function in posttraumatic stress disorder. *Biological psychiatry*. 2001;50(12):932-42.
198. Siegle GJ, Steinhauer SR, Thase ME, Stenger VA, Carter CS. Can't shake that feeling: event-related fMRI assessment of sustained amygdala activity in response to emotional information in depressed individuals. *Biological psychiatry*. 2002;51(9):693-707.
199. Simon D, Adler N, Kaufmann C, Kathmann N. Amygdala hyperactivation during symptom provocation in obsessive-compulsive disorder and its modulation by distraction. *Neuroimage Clin*. 2014;4:549-57.
200. Sinha R, Lacadie C, Skudlarski P, Fulbright RK, Rounsaville BJ, Kosten TR, et al. Neural activity associated with stress-induced cocaine craving: a functional magnetic resonance imaging study. *Psychopharmacology*. 2005;183(2):171-80.
201. Smoski MJ, Felder J, Bizzell J, Green SR, Ernst M, Lynch TR, et al. fMRI of alterations in reward selection, anticipation, and feedback in major depressive disorder. *Journal of affective disorders*. 2009;118(1-3):69-78.
202. Smoski MJ, Keng SL, Schiller CE, Minkel J, Dichter GS. Neural mechanisms of cognitive reappraisal in remitted major depressive disorder. *Journal of affective disorders*. 2013;151(1):171-7.
203. Smoski MJ, Rittenberg A, Dichter GS. Major depressive disorder is characterized by greater reward network activation to monetary than pleasant image rewards. *Psychiatry research*. 2011;194(3):263-70.
204. Spilka MJ, Goghari VM. Similar patterns of brain activation abnormalities during emotional and non-emotional judgments of faces in a schizophrenia family study. *Neuropsychologia*. 2017;96:164-74.
205. Stephanou K, Davey CG, Kerestes R, Whittle S, Harrison BJ. Hard to look on the bright side: neural correlates of impaired emotion regulation in depressed youth. *Soc Cogn Affect Neurosci*. 2017;12(7):1138-48.
206. Stevens JS, Jovanovic T, Fani N, Ely TD, Glover EM, Bradley B, et al. Disrupted amygdala-prefrontal functional connectivity in civilian women with posttraumatic stress disorder. *Journal of psychiatric research*. 2013;47(10):1469-78.
207. Strakowski SM, Eliassen JC, Lamy M, Cerullo MA, Allendorfer JB, Madore M, et al. Functional magnetic resonance imaging brain activation in bipolar mania: evidence for disruption of the ventrolateral prefrontal-amygdala emotional pathway. *Biological psychiatry*. 2011;69(4):381-8.
208. Straube T, Mentzel HJ, Miltner WH. Waiting for spiders: brain activation during anticipatory anxiety in spider phobics. *NeuroImage*. 2007;37(4):1427-36.



209. Strigo IA, Matthews SC, Simmons AN. Right anterior insula hypoactivity during anticipation of homeostatic shifts in major depressive disorder. *Psychosom Med*. 2010;72(3):316-23.
210. Strigo IA, Matthews SC, Simmons AN. Decreased frontal regulation during pain anticipation in unmedicated subjects with major depressive disorder. *Translational psychiatry*. 2013;3:e239.
211. Strigo IA, Simmons AN, Matthews SC, Craig AD, Paulus MP. Association of major depressive disorder with altered functional brain response during anticipation and processing of heat pain. *Archives of general psychiatry*. 2008;65(11):1275-84.
212. Surguladze S, Brammer MJ, Keedwell P, Giampietro V, Young AW, Travis MJ, et al. A differential pattern of neural response toward sad versus happy facial expressions in major depressive disorder. *Biological psychiatry*. 2005;57(3):201-9.
213. Surguladze S, Russell T, Kucharska-Pietura K, Travis MJ, Giampietro V, David AS, et al. A reversal of the normal pattern of parahippocampal response to neutral and fearful faces is associated with reality distortion in schizophrenia. *Biological psychiatry*. 2006;60(5):423-31.
214. Surguladze SA, Chu EM, Marshall N, Evans A, Anilkumar AP, Timehin C, et al. Emotion processing in schizophrenia: fMRI study of patients treated with risperidone long-acting injections or conventional depot medication. *J Psychopharmacol*. 2011;25(6):722-33.
215. Surguladze SA, El-Hage W, Dalgleish T, Radua J, Gohier B, Phillips ML. Depression is associated with increased sensitivity to signals of disgust: a functional magnetic resonance imaging study. *Journal of psychiatric research*. 2010;44(14):894-902.
216. Surguladze SA, Marshall N, Schulze K, Hall MH, Walshe M, Bramon E, et al. Exaggerated neural response to emotional faces in patients with bipolar disorder and their first-degree relatives. *NeuroImage*. 2010;53(1):58-64.
217. Takahashi H, Koeda M, Oda K, Matsuda T, Matsushima E, Matsuura M, et al. An fMRI study of differential neural response to affective pictures in schizophrenia. *NeuroImage*. 2004;22(3):1247-54.
218. Taylor SF, Liberzon I, Decker LR, Koeppe RA. A functional anatomic study of emotion in schizophrenia. *Schizophrenia research*. 2002;58(2-3):159-72.
219. Thomaes K, Dorrepaal E, Draijer NP, de Ruiter MB, Elzinga BM, van Balkom AJ, et al. Increased activation of the left hippocampus region in Complex PTSD during encoding and recognition of emotional words: a pilot study. *Psychiatry research*. 2009;171(1):44-53.
220. Tillfors M, Furmark T, Marteinsdottir I, Fischer H, Pissiota A, Langstrom B, et al. Cerebral blood flow in subjects with social phobia during stressful speaking tasks: a PET study. *The American journal of psychiatry*. 2001;158(8):1220-6.
221. Townsend JD, Torrisi SJ, Lieberman MD, Sugar CA, Bookheimer SY, Altshuler LL. Frontal-amygdala connectivity alterations during emotion downregulation in bipolar I disorder. *Biological psychiatry*. 2013;73(2):127-35.
222. Tozzi L, Doolin K, Farrel C, Joseph S, O'Keane V, Frodl T. Functional magnetic resonance imaging correlates of emotion recognition and voluntary attentional regulation in depression: A generalized psycho-physiological interaction study. *Journal of affective disorders*. 2017;208:535-44.

223. Tseng HH, Roiser JP, Modinos G, Falkenberg I, Samson C, McGuire P, et al. Corticolimbic dysfunction during facial and prosodic emotional recognition in first-episode psychosis patients and individuals at ultra-high risk. *Neuroimage Clin.* 2016;12:645-54.
224. Ursu S, Kring AM, Gard MG, Minzenberg MJ, Yoon JH, Ragland JD, et al. Prefrontal cortical deficits and impaired cognition-emotion interactions in schizophrenia. *The American journal of psychiatry.* 2011;168(3):276-85.
225. van den Heuvel OA, Veltman DJ, Groenewegen HJ, Dolan RJ, Cath DC, Boellaard R, et al. Amygdala activity in obsessive-compulsive disorder with contamination fear: a study with oxygen-15 water positron emission tomography. *Psychiatry research.* 2004;132(3):225-37.
226. van den Heuvel OA, Veltman DJ, Groenewegen HJ, Witter MP, Merkelbach J, Cath DC, et al. Disorder-specific neuroanatomical correlates of attentional bias in obsessive-compulsive disorder, panic disorder, and hypochondriasis. *Archives of general psychiatry.* 2005;62(8):922-33.
227. van Wingen GA, van Eijndhoven P, Tendolkar I, Buitelaar J, Verkes RJ, Fernandez G. Neural basis of emotion recognition deficits in first-episode major depression. *Psychological medicine.* 2011;41(7):1397-405.
228. Vercammen A, Morris R, Green MJ, Lenroot R, Kulkarni J, Carr VJ, et al. Reduced neural activity of the prefrontal cognitive control circuitry during response inhibition to negative words in people with schizophrenia. *J Psychiatry Neurosci.* 2012;37(6):379-88.
229. Vermetten E, Schmahl C, Southwick SM, Bremner JD. Positron tomographic emission study of olfactory induced emotional recall in veterans with and without combat-related posttraumatic stress disorder. *Psychopharmacology bulletin.* 2007;40(1):8-30.
230. Via E, Cardoner N, Pujol J, Alonso P, Lopez-Sola M, Real E, et al. Amygdala activation and symptom dimensions in obsessive-compulsive disorder. *The British journal of psychiatry : the journal of mental science.* 2014;204(1):61-8.
231. Victor TA, Furey ML, Fromm SJ, Bellgowan PS, Ohman A, Drevets WC. The extended functional neuroanatomy of emotional processing biases for masked faces in major depressive disorder. *PLoS One.* 2012;7(10):e46439.
232. Victor TA, Furey ML, Fromm SJ, Ohman A, Drevets WC. Relationship between amygdala responses to masked faces and mood state and treatment in major depressive disorder. *Archives of general psychiatry.* 2010;67(11):1128-38.
233. Victor TA, Furey ML, Fromm SJ, Ohman A, Drevets WC. Changes in the neural correlates of implicit emotional face processing during antidepressant treatment in major depressive disorder. *Int J Neuropsychopharmacol.* 2013;16(10):2195-208.
234. Vizueta N, Rudie JD, Townsend JD, Torrisi S, Moody TD, Bookheimer SY, et al. Regional fMRI hypoactivation and altered functional connectivity during emotion processing in nonmedicated depressed patients with bipolar II disorder. *The American journal of psychiatry.* 2012;169(8):831-40.
235. Wagner G, Schachtzabel C, Peikert G, Bar KJ. The neural basis of the abnormal self-referential processing and its impact on cognitive control in depressed patients. *Hum Brain Mapp.* 2015;36(7):2781-94.

236. Wang L, Krishnan KR, Steffens DC, Potter GG, Dolcos F, McCarthy G. Depressive state- and disease-related alterations in neural responses to affective and executive challenges in geriatric depression. *The American journal of psychiatry*. 2008;165(7):863-71.
237. Wang L, LaBar KS, Smoski M, Rosenthal MZ, Dolcos F, Lynch TR, et al. Prefrontal mechanisms for executive control over emotional distraction are altered in major depression. *Psychiatry research*. 2008;163(2):143-55.
238. Wessa M, Houenou J, Paillere-Martinot ML, Berthoz S, Artiges E, Leboyer M, et al. Fronto-striatal overactivation in euthymic bipolar patients during an emotional go/nogo task. *The American journal of psychiatry*. 2007;164(4):638-46.
239. Whalley HC, McKirdy J, Romaniuk L, Sussmann J, Johnstone EC, Wan HI, et al. Functional imaging of emotional memory in bipolar disorder and schizophrenia. *Bipolar disorders*. 2009;11(8):840-56.
240. Williams LM, Das P, Harris AW, Liddell BB, Brammer MJ, Olivieri G, et al. Dysregulation of arousal and amygdala-prefrontal systems in paranoid schizophrenia. *The American journal of psychiatry*. 2004;161(3):480-9.
241. Williams LM, Das P, Liddell BJ, Olivieri G, Peduto AS, David AS, et al. Fronto- limbic and autonomic disjunctions to negative emotion distinguish schizophrenia subtypes. *Psychiatry research*. 2007;155(1):29-44.
242. Williams LM, Kemp AH, Felmingham K, Barton M, Olivieri G, Peduto A, et al. Trauma modulates amygdala and medial prefrontal responses to consciously attended fear. *NeuroImage*. 2006;29(2):347-57.
243. Wright CI, Martis B, McMullin K, Shin LM, Rauch SL. Amygdala and insular responses to emotionally valenced human faces in small animal specific phobia. *Biological psychiatry*. 2003;54(10):1067-76.
244. Xiong K, Zhang Y, Qiu M, Zhang J, Sang L, Wang L, et al. Negative emotion regulation in patients with posttraumatic stress disorder. *PLoS One*. 2013;8(12):e81957.
245. Yang H, Devous MD, Briggs RW, Spence JS, Xiao H, Kreyling N, et al. Altered neural processing of threat in alcohol-dependent men. *Alcoholism, clinical and experimental research*. 2013;37(12):2029-38.
246. Yang JC. Functional neuroanatomy in depressed patients with sexual dysfunction: blood oxygenation level dependent functional MR imaging. *Korean journal of radiology*. 2004;5(2):87-95.
247. Yang W, Chen Q, Liu P, Cheng H, Cui Q, Wei D, et al. Abnormal brain activation during directed forgetting of negative memory in depressed patients. *Journal of affective disorders*. 2016;190:880-8.
248. Yoon KL, Fitzgerald DA, Angstadt M, McCarron RA, Phan KL. Amygdala reactivity to emotional faces at high and low intensity in generalized social phobia: a 4-Tesla functional MRI study. *Psychiatry research*. 2007;154(1):93-8.
249. Yoshimura S, Okamoto Y, Onoda K, Matsunaga M, Ueda K, Suzuki S, et al. Rostral anterior cingulate cortex activity mediates the relationship between the depressive symptoms and the medial prefrontal cortex activity. *Journal of affective disorders*. 2010;122(1-2):76-85.
250. Zamoscik V, Huffziger S, Ebner-Priemer U, Kuehner C, Kirsch P. Increased involvement of the parahippocampal gyri in a sad mood predicts future depressive symptoms. *Soc Cogn Affect Neurosci*. 2014;9(12):2034-40.

251. Zhang B, Li S, Zhuo C, Li M, Safron A, Genz A, et al. Altered task-specific deactivation in the default mode network depends on valence in patients with major depressive disorder. *Journal of affective disorders*. 2017;207:377-83.
252. Zhang JN, Xiong KL, Qiu MG, Zhang Y, Xie B, Wang J, et al. Negative emotional distraction on neural circuits for working memory in patients with posttraumatic stress disorder. *Brain research*. 2013;1531:94-101.
253. Zhong M, Wang X, Xiao J, Yi J, Zhu X, Liao J, et al. Amygdala hyperactivation and prefrontal hypoactivation in subjects with cognitive vulnerability to depression. *Biol Psychol*. 2011;88(2-3):233-42.
254. Ziv M, Goldin PR, Jazaieri H, Hahn KS, Gross JJ. Emotion regulation in social anxiety disorder: behavioral and neural responses to three socio-emotional tasks. *Biol Mood Anxiety Disord*. 2013;3(1):20.

TABLE S2. Peak coordinates of clusters derived from Activation Likelihood Estimation (ALE) meta-analysis of transdiagnostic pooled patient hyper- and hypoactivation (i.e., aberrant activation across disorders) during functional neuroimaging of emotional processing tasks.

| Region                                                                      | Cluster Size (voxels) | Peak Intensity (Z) | X   | MNI Coordinates |     |  |
|-----------------------------------------------------------------------------|-----------------------|--------------------|-----|-----------------|-----|--|
|                                                                             |                       |                    |     | Y               | Z   |  |
| Right Inferior frontal gyrus/<br>ventrolateral prefrontal cortex            | 609                   | 5.34               | 40  | 36              | -12 |  |
| Left amygdala/<br>hippocampus/<br>parahippocampal gyrus                     | 976                   | 7.79               | -26 | -8              | -18 |  |
| Right amygdala                                                              | 439                   | 6.51               | 26  | -4              | -18 |  |
| Dorsal anterior cingulate<br>extending to<br>ventromedial prefrontal cortex | 838                   | 4.33               | 12  | 42              | 10  |  |
| Inferior occipital/fusiform                                                 | 382                   | 5.52               | -36 | -70             | -8  |  |
| Thalamus                                                                    | 713                   | 5.61               | 0   | -8              | 8   |  |

TABLE S3. Percent contribution to clusters of convergence for whole-brain pooled aberrant activation meta-analytic contrasts by experiment sample and design characteristics.

| Experiment sample/<br>design characteristics | Cluster of convergence                                                    |                               |                   |                                                               |                                                       |          |
|----------------------------------------------|---------------------------------------------------------------------------|-------------------------------|-------------------|---------------------------------------------------------------|-------------------------------------------------------|----------|
|                                              | Right Inferior<br>frontal gyrus/<br>ventrolateral<br>prefrontal<br>cortex | Left amygdala/<br>hippocampus | Right<br>amygdala | Dorsomedial<br>prefrontal<br>cortex/<br>anterior<br>cingulate | Inferior<br>occipital<br>cortex/<br>fusiform<br>gyrus | Thalamus |
| <b>Contrast Direction</b>                    |                                                                           |                               |                   |                                                               |                                                       |          |
| Control > Patient                            | 59.42                                                                     | 31.14                         | 57.8              | 49.19                                                         | 67.55                                                 | 52.71    |
| Patient > Control                            | 40.58                                                                     | 68.86                         | 42.2              | 50.81                                                         | 32.45                                                 | 47.29    |
| <b>Disorder Class</b>                        |                                                                           |                               |                   |                                                               |                                                       |          |
| Non-psychotic                                | 83.46                                                                     | 85.14                         | 73.58             | 79.27                                                         | 56.78                                                 | 70.93    |
| Psychotic                                    | 16.54                                                                     | 14.86                         | 26.42             | 20.73                                                         | 43.22                                                 | 29.07    |
| <b>Broad Diagnostic Group</b>                |                                                                           |                               |                   |                                                               |                                                       |          |
| Anxiety                                      | 26.53                                                                     | 39.11                         | 23.55             | 27.17                                                         | 22.44                                                 | 30       |
| Major Depression                             | 19.39                                                                     | 28.18                         | 29.08             | 22.54                                                         | 16.38                                                 | 21.02    |
| Schizophrenia                                | 16.54                                                                     | 14.86                         | 26.42             | 20.73                                                         | 43.22                                                 | 29.07    |
| Bipolar Disorder                             | 24.95                                                                     | 15.12                         | 17.99             | 18.46                                                         | 10.42                                                 | 11.38    |
| Substance Use                                | 12.59                                                                     | 2.72                          | 2.96              | 11.09                                                         | 7.54                                                  | 8.53     |
| <b>Specific Diagnostic Group</b>             |                                                                           |                               |                   |                                                               |                                                       |          |
| Mixed Anxiety Disorders                      | 0                                                                         | 0                             | 0                 | 0                                                             | 0                                                     | 0        |
| Mixed Anxiety/<br>Depression                 | 0                                                                         | 0                             | 0                 | 1.4                                                           | 0                                                     | 0        |
| SUD: Cannabis                                | 0                                                                         | 0.03                          | 0                 | 0                                                             | 0                                                     | 0.15     |
| SUD: Methamphetamine                         | 6.44                                                                      | 0.1                           | 0                 | 0.01                                                          | 0.1                                                   | 0.08     |
| GAD                                          | 2.67                                                                      | 5.78                          | 0.77              | 2.86                                                          | 2.76                                                  | 0        |
| SUD: Alcohol                                 | 4.15                                                                      | 0.34                          | 2.09              | 7.69                                                          | 7.44                                                  | 1.04     |
| SUD: Cocaine                                 | 2.01                                                                      | 2.26                          | 0.87              | 3.39                                                          | 0.01                                                  | 7.27     |
| Panic Disorder                               | 0.71                                                                      | 1                             | 0.12              | 1.44                                                          | 0.86                                                  | 1.44     |
| Specific Phobia                              | 1.75                                                                      | 3.42                          | 3.89              | 1.63                                                          | 1.84                                                  | 7.38     |
| Social Anxiety Disorder                      | 5.58                                                                      | 6.37                          | 3.89              | 4.84                                                          | 2.57                                                  | 3.79     |

|                                 |       |       |       |       |       |       |
|---------------------------------|-------|-------|-------|-------|-------|-------|
| OCD                             | 5.03  | 11.36 | 11.07 | 3.37  | 5.74  | 4.44  |
| PTSD                            | 10.79 | 11.18 | 26.42 | 11.61 | 8.66  | 12.95 |
| Bipolar Disorder                | 24.95 | 15.12 | 17.99 | 18.46 | 10.42 | 11.38 |
| Schizophrenia                   | 16.54 | 14.86 | 26.42 | 20.73 | 43.22 | 29.07 |
| Major Depression                | 19.39 | 28.18 | 29.08 | 22.54 | 16.38 | 21.02 |
| Age Group                       |       |       |       |       |       |       |
| Adult                           | 91.14 | 94.42 | 87.24 | 91.51 | 66.61 | 84.88 |
| Child/adolescent                | 7     | 2.18  | 10.87 | 7     | 29.26 | 13.82 |
| Older adult                     | 1.86  | 3.39  | 1.89  | 1.49  | 4.13  | 1.3   |
| Current Psychotropic Medication |       |       |       |       |       |       |
| Yes                             | 51.78 | 51.85 | 60.34 | 56.69 | 63.41 | 50.35 |
| No                              | 47.93 | 45.12 | 39.65 | 40.34 | 36.59 | 44.79 |
| Not reported                    | 0.29  | 3.03  | 0.02  | 2.97  | 0     | 4.85  |
| Behavioral Performance/Rating   |       |       |       |       |       |       |
| Yes                             | 43.62 | 59.49 | 53.73 | 59.51 | 58.58 | 53.22 |
| No                              | 56.38 | 40.51 | 46.27 | 40.49 | 41.42 | 46.78 |
| Imaging Modality                |       |       |       |       |       |       |
| Functional MRI                  | 91.25 | 89.53 | 93.09 | 95.2  | 89.68 | 96.22 |
| PET                             | 8.75  | 10.47 | 6.91  | 4.8   | 10.32 | 3.78  |
| SPECT                           | 0     | 0     | 0     | 0     | 0     | 0     |
| Task Process                    |       |       |       |       |       |       |
| Reactivity                      | 80.87 | 72.8  | 83.66 | 83.86 | 76.9  | 84.66 |
| Regulation                      | 9.09  | 3.47  | 0     | 3.68  | 7.3   | 5.69  |
| Compound                        | 10.04 | 23.72 | 16.34 | 12.7  | 15.8  | 9.64  |
| Valence                         |       |       |       |       |       |       |
| Emotional                       | 7.58  | 9.66  | 10.36 | 14.43 | 5.57  | 12.13 |
| Pleasant                        | 21.4  | 8.76  | 23.7  | 22.7  | 14.55 | 20    |
| Unpleasant                      | 71.02 | 81.59 | 65.94 | 62.87 | 79.88 | 67.87 |
| Task Type                       |       |       |       |       |       |       |
| Picture processing              | 62.84 | 48.75 | 55.85 | 59.14 | 62.51 | 52.11 |
| Script processing               | 3.11  | 5.1   | 5.8   | 10.2  | 5.25  | 15.03 |

|                   |       |       |       |       |       |       |
|-------------------|-------|-------|-------|-------|-------|-------|
| Emotional stroop  | 1.98  | 9.02  | 10.84 | 8.65  | 2.01  | 4.74  |
| Fear conditioning | 2.75  | 2.56  | 1.29  | 6.44  | 4.61  | 1.42  |
| Stimulus Type     |       |       |       |       |       |       |
| Faces             | 46    | 41.2  | 46.1  | 43.34 | 56.57 | 38.1  |
| Scenes            | 30.54 | 26.14 | 25.09 | 27.01 | 21.52 | 30.24 |
| Words             | 5.37  | 15.72 | 13.84 | 13.76 | 7.24  | 8.77  |
| Scripts           | 3.11  | 5.1   | 5.8   | 10.2  | 5.25  | 15.03 |
| Shapes            | 5.45  | 3.26  | 2.97  | 2.94  | 3.04  | 1.3   |

---

Contributions by task and stimulus type are reported for categories that contained at least 12 unique contrasts.



TABLE S4. Peak coordinates of clusters derived from Activation Likelihood Estimation (ALE) meta-analysis of transdiagnostic pooled patient hyper- and hypoactivation (i.e., aberrant activation across disorders) during functional neuroimaging of different emotional processes

| Process/Contrast/ Region                                     | Cluster Size (voxels) | Peak Intensity (Z) | MNI Coordinates |    |     |
|--------------------------------------------------------------|-----------------------|--------------------|-----------------|----|-----|
|                                                              |                       |                    | X               | Y  | Z   |
| <b>Reactivity</b>                                            |                       |                    |                 |    |     |
| Left amygdala/<br>hippocampus/<br>parahippocampal gyrus      | 506                   | 6.15               | -26             | -6 | -20 |
| Right amygdala/<br>hippocampus/<br>parahippocampal gyrus     | 422                   | 6.49               | 26              | -4 | -18 |
| Right anterior insula/<br>ventrolateral prefrontal<br>cortex | 40                    | 4.67               | 40              | 32 | -12 |
| Ventromedial prefrontal<br>cortex                            | 328                   | 4.25               | -8              | 34 | -16 |
| Thalamus                                                     | 733                   | 5.21               | 0               | -8 | 8   |
| Dorsal anterior cingulate                                    | 477                   | 4.77               | 10              | 40 | 8   |
| <b>Compound</b>                                              |                       |                    |                 |    |     |
| Left amygdala/<br>hippocampus/<br>parahippocampal gyrus      | 314                   | 5.63               | -26             | -8 | -16 |
| Right dorsolateral prefrontal<br>cortex                      | 235                   | 4.80               | 36              | 42 | 32  |
| <b>Regulate</b>                                              |                       |                    |                 |    |     |
| Right anterior<br>insula/prefrontal cortex                   | 151                   | 5.15               | 40              | 40 | -10 |

TABLE S5. Peak coordinates of clusters derived from Activation Likelihood Estimation (ALE) meta-analysis of pooled hyper- and hypo-activation during functional neuroimaging of emotional processing separately for psychotic and non-psychotic samples.

| Class/Contrast/ Region                                        | Cluster Size (voxels) | Peak Intensity (Z) | X   | MNI Coordinates |     |
|---------------------------------------------------------------|-----------------------|--------------------|-----|-----------------|-----|
|                                                               |                       |                    |     | Y               | Z   |
| Non-Psychotic Pooled Activation                               |                       |                    |     |                 |     |
| Right inferior frontal gyrus/ ventrolateral prefrontal cortex | 631                   | 5.22               | 40  | 34              | -12 |
| Left amygdala/ hippocampus/ parahippocampal gyrus             | 1030                  | 7.14               | -26 | -8              | -18 |
| Right amygdala/ hippocampus/ Thalamus                         | 311                   | 4.92               | 26  | -4              | -18 |
| Dorsal anterior cingulate                                     | 504                   | 5.17               | -2  | -8              | 6   |
|                                                               | 411                   | 3.80               | 2   | 52              | 8   |
| Psychotic Pooled Activation                                   |                       |                    |     |                 |     |
| Calcarine fissure                                             | 345                   | 6.96               | -36 | -70             | -8  |
| Left fusiform gyrus/cuneus                                    | 261                   | 7.47               | 32  | -78             | -6  |
| Thalamus                                                      | 370                   | 5.09               | -2  | -18             | 2   |
| Right fusiform gyrus/cuneus                                   | 220                   | 6.50               | 8   | -82             | 16  |

TABLE S6. Peak coordinates of clusters derived from Activation Likelihood Estimation (ALE) meta-analysis of transdiagnostic patient hyper- and hypoactivation (i.e., pooled across disorders and processing tasks) during functional neuroimaging of emotional processing.

| Contrast/ Region                                 | Cluster Size (voxels) | Peak Intensity (Z) | MNI Coordinates |     |     |
|--------------------------------------------------|-----------------------|--------------------|-----------------|-----|-----|
|                                                  |                       |                    | X               | Y   | Z   |
| Control > Patient                                |                       |                    |                 |     |     |
| Right ventrolateral prefrontal cortex            | 364                   | 5.20               | 38              | 34  | -12 |
| Dorsomedial Thalamus                             | 445                   | 4.48               | -2              | -18 | 2   |
| Dorsomedial prefrontal cortex/anterior cingulate | 265                   | 3.90               | 0               | 44  | 30  |
| Patient > Control                                |                       |                    |                 |     |     |
| Left amygdala/hippocampus/parahippocampal gyrus  | 1142                  | 6.84               | -26             | -6  | -18 |
| Dorsomedial thalamus                             | 265                   | 4.89               | -2              | -8  | 6   |

TABLE S7. Percent contribution to clusters of convergence for whole-brain patient hypo- and hyper-activation contrasts by experiment sample and design characteristics.

| Experiment sample/<br>design characteristics | Cluster of convergence                         |                         |                                     |                  |                         |
|----------------------------------------------|------------------------------------------------|-------------------------|-------------------------------------|------------------|-------------------------|
|                                              | Right<br>ventrolateral<br>prefrontal<br>cortex | Dorsomedial<br>Thalamus | Dorsomedial<br>prefrontal<br>cortex | Left<br>amygdala | Dorsomedial<br>thalamus |
| <b>Contrast Direction</b>                    |                                                |                         |                                     |                  |                         |
| Control > Patient                            | 100                                            | 100                     | 100                                 | 0                | 0                       |
| Patient > Control                            | 0                                              | 0                       | 0                                   | 100              | 100                     |
| <b>Disorder Class</b>                        |                                                |                         |                                     |                  |                         |
| Non-psychotic                                | 84.99                                          | 41.65                   | 76.16                               | 97.84            | 94.7                    |
| Psychotic                                    | 15.01                                          | 58.35                   | 23.84                               | 2.16             | 5.3                     |
| <b>Broad Diagnostic Group</b>                |                                                |                         |                                     |                  |                         |
| Anxiety                                      | 13.31                                          | 13.36                   | 19.14                               | 44.35            | 44.35                   |
| Major Depression                             | 18.07                                          | 14.94                   | 30.97                               | 37.81            | 21.79                   |
| Schizophrenia                                | 15.01                                          | 58.35                   | 23.84                               | 2.16             | 5.3                     |
| Bipolar Disorder                             | 32.9                                           | 10.36                   | 7.78                                | 12.48            | 9.53                    |
| Substance Use                                | 20.72                                          | 2.98                    | 18.26                               | 3.21             | 19.03                   |
| <b>Specific Diagnostic Group</b>             |                                                |                         |                                     |                  |                         |
| Mixed Anxiety Disorders                      | 0                                              | 0                       | 0                                   | 0                | 0                       |
| Mixed Anxiety/Depression                     | 0                                              | 0                       | 0                                   | 0                | 0                       |
| SUD: Cannabis                                | 0                                              | 0                       | 1.1                                 | 0                | 0                       |
| SUD: Methamphetamine                         | 11.47                                          | 0.26                    | 1.36                                | 0                | 0                       |
| GAD                                          | 5.89                                           | 0                       | 0                                   | 3.82             | 0                       |
| SUD: Alcohol                                 | 4.99                                           | 0.06                    | 15.44                               | 0.56             | 3.24                    |
| SUD: Cocaine                                 | 4.26                                           | 2.66                    | 0.36                                | 2.64             | 15.78                   |
| Panic Disorder                               | 0                                              | 2.73                    | 0                                   | 1.11             | 3.25                    |
| Specific Phobia                              | 0                                              | 0                       | 0                                   | 5.12             | 14.17                   |
| Social Anxiety Disorder                      | 0                                              | 0                       | 10.47                               | 7.02             | 7.18                    |
| OCD                                          | 0.01                                           | 0                       | 0.5                                 | 16.35            | 6.62                    |

|                                 |       |       |       |       |       |
|---------------------------------|-------|-------|-------|-------|-------|
| PTSD                            | 7.41  | 10.64 | 8.17  | 10.92 | 13.13 |
| Bipolar Disorder                | 32.9  | 10.36 | 7.78  | 12.48 | 9.53  |
| Schizophrenia                   | 15.01 | 58.35 | 23.84 | 2.16  | 5.3   |
| Major Depression                | 18.07 | 14.94 | 30.97 | 37.81 | 21.79 |
| Age Group                       |       |       |       |       |       |
| Adult                           | 89.06 | 84.3  | 88.28 | 93.03 | 83.43 |
| Child/adolescent                | 10.35 | 15.7  | 4.01  | 2.57  | 12.64 |
| Older adult                     | 0.59  | 0     | 7.71  | 4.4   | 3.94  |
| Current Psychotropic Medication |       |       |       |       |       |
| Yes                             | 50.21 | 67.68 | 35.43 | 41.07 | 34.18 |
| No                              | 49.79 | 32.32 | 61.44 | 55.19 | 50.04 |
| Not reported                    | 0     | 0     | 3.14  | 3.73  | 15.78 |
| Behavioral Performance/Rating   |       |       |       |       |       |
| Yes                             | 34.72 | 67.83 | 57.05 | 55.1  | 34.46 |
| No                              | 65.28 | 32.17 | 42.95 | 44.9  | 65.54 |
| Imaging Modality                |       |       |       |       |       |
| Functional MRI                  | 89.23 | 95.54 | 94.96 | 91.99 | 96.27 |
| PET                             | 10.77 | 4.46  | 5.04  | 8.01  | 3.73  |
| SPECT                           | 0     | 0     | 0     | 0     | 0     |
| Task Process                    |       |       |       |       |       |
| Reactivity                      | 83.2  | 91.92 | 85.8  | 75.32 | 74.77 |
| Regulation                      | 11.11 | 3.27  | 2.93  | 2.96  | 10.84 |
| Compound                        | 5.7   | 4.81  | 11.27 | 21.72 | 14.39 |
| Valence                         |       |       |       |       |       |
| Emotional                       | 7.82  | 16.6  | 3.59  | 7.3   | 4.81  |
| Pleasant                        | 29.49 | 32.45 | 52.44 | 5.74  | 11.16 |
| Unpleasant                      | 62.69 | 50.96 | 43.97 | 86.96 | 84.04 |
| Task Type                       |       |       |       |       |       |
| Picture processing              | 64.58 | 54.7  | 43.43 | 57.47 | 50.45 |
| Script processing               | 3.69  | 10.27 | 19.95 | 4.59  | 20.66 |

|                   |       |       |       |       |       |
|-------------------|-------|-------|-------|-------|-------|
| Emotional Stroop  | 0.59  | 3     | 8.07  | 9.55  | 4.78  |
| Fear Conditioning | 0     | 0.46  | 0.37  | 2.22  | 3.59  |
| Stimulus Type     |       |       |       |       |       |
| Faces             | 48.31 | 47.25 | 36.18 | 45.04 | 22.83 |
| Scenes            | 25.59 | 25.45 | 14.86 | 29.19 | 40.63 |
| Words             | 0.59  | 11.45 | 18.35 | 12.16 | 4.78  |
| Scripts           | 3.69  | 10.27 | 19.95 | 4.59  | 20.66 |
| Shapes            | 8.4   | 2.47  | 4.43  | 1.84  | 0     |

---

Contributions by task and stimulus type are reported for categories that contained at least 12 unique contrasts.

TABLE S8. Peak coordinates of clusters derived from Activation Likelihood Estimation (ALE) meta-analysis of transdiagnostic patient hyper- and hypoactivation (i.e., pooled across disorders) during functional neuroimaging of emotional processing by task process

| Disorder/Contrast/ Region                           | Cluster Size (voxels) | Peak Intensity (Z) | MNI Coordinates |     |     |
|-----------------------------------------------------|-----------------------|--------------------|-----------------|-----|-----|
|                                                     |                       |                    | X               | Y   | Z   |
| <b>Control &gt; Patient</b>                         |                       |                    |                 |     |     |
| <b>Compound</b>                                     |                       |                    |                 |     |     |
| Right putamen                                       | 223                   | 4.19               | 18              | 14  | -8  |
| <b>Reactivity</b>                                   |                       |                    |                 |     |     |
| Right amygdala                                      | 242                   | 6.49               | 26              | -4  | -18 |
| Right ventrolateral prefrontal cortex               | 374                   | 5.29               | 38              | 32  | -12 |
| Dorsomedial thalamus                                | 529                   | 4.75               | -2              | -18 | 2   |
| <b>Patient &gt; Control</b>                         |                       |                    |                 |     |     |
| <b>Compound</b>                                     |                       |                    |                 |     |     |
| Left amygdala/ hippocampal/ parahippocampal gyrus   | 272                   | 4.71               | -28             | -8  | -16 |
| <b>Reactivity</b>                                   |                       |                    |                 |     |     |
| Left Amygdala                                       | 848                   | 5.92               | -20             | -2  | -16 |
| Ventromedial prefrontal cortex/ subgenual cingulate | 303                   | 4.96               | -8              | 32  | -16 |

TABLE S9. Peak coordinates of clusters derived from Activation Likelihood Estimation (ALE) meta-analysis of hyper and hypoactivation during functional neuroimaging of emotional processing separately for psychotic and non-psychotic samples.

| Contrast/ Region                                  | Cluster Size (voxels) | Peak Intensity (Z) | MNI Coordinates |     |     |
|---------------------------------------------------|-----------------------|--------------------|-----------------|-----|-----|
|                                                   |                       |                    | X               | Y   | Z   |
| <b>Control &gt; Patient Non-Psychotic</b>         |                       |                    |                 |     |     |
| Anterior cingulate/ventromedial prefrontal cortex | 291                   | 4.31               | -6              | 38  | -4  |
| Right ventrolateral prefrontal cortex             | 461                   | 5.47               | 38              | 32  | -12 |
| <b>Control &gt; Patient Psychotic</b>             |                       |                    |                 |     |     |
| Right fusiform gyrus                              | 244                   | 7.74               | 32              | -78 | -6  |
| Left fusiform gyrus                               | 343                   | 7.12               | -36             | -70 | -8  |
| Dorsomedial thalamus                              | 416                   | 5.34               | -2              | -18 | 2   |
| <b>Patient Non-Psychotic &gt; Control</b>         |                       |                    |                 |     |     |
| Left amygdala                                     | -26                   | 7.02               | -26             | -6  | -18 |
| <b>Patient Psychotic &gt; Control</b>             |                       |                    |                 |     |     |
| Cuneus/ calcarine fissure                         | 301                   | 7.76               | 8               | -82 | 16  |



TABLE S10. Peak coordinates of clusters derived from Activation Likelihood Estimation (ALE) meta-analysis of patient hyper- and hypoactivation during functional neuroimaging of emotional processing by broad disorder grouping.

| Disorder/Contrast/ Region                                     | Cluster Size (voxels) | Peak Intensity (Z) | MNI Coordinates |     |     |
|---------------------------------------------------------------|-----------------------|--------------------|-----------------|-----|-----|
|                                                               |                       |                    | X               | Y   | Z   |
| Control > Patient Bipolar                                     |                       |                    |                 |     |     |
| Right inferior frontal gyrus/ ventrolateral prefrontal cortex | 389                   | 4.54               | 38              | 36  | -12 |
| Control > Patient MDD                                         |                       |                    |                 |     |     |
| Cerebellum                                                    | 254                   | 4.17               | -2              | -28 | 6   |
| Control > Patient SCZ                                         |                       |                    |                 |     |     |
| Right fusiform gyrus                                          | 244                   | 7.74               | 32              | -78 | -6  |
| Left fusiform gyrus                                           | 343                   | 7.12               | -36             | -70 | -8  |
| Thalamus                                                      | 416                   | 5.34               | -2              | -18 | 2   |
| Control > Patient SUD                                         |                       |                    |                 |     |     |
| Right inferior frontal gyrus/ventrolateral prefrontal cortex  | 182                   | 5.21               | 50              | 42  | -4  |
| Patient ANX > Control                                         |                       |                    |                 |     |     |
| Left amygdala                                                 | 659                   | 5.47               | -26             | -6  | -18 |
| Patient MDD > Control                                         |                       |                    |                 |     |     |
| Left amygdala/ hippocampus                                    | 234                   | 4.54               | -26             | -8  | -18 |
| Patient SCZ > Control                                         |                       |                    |                 |     |     |
| Cuneus/ calcarine fissure                                     | 301                   | 7.76               | 8               | -82 | 16  |

## REFERENCES

1. Langner R, Leiberg S, Hoffstaedter F, Eickhoff SB. Towards a human self-regulation system: Common and distinct neural signatures of emotional and behavioural control. *Neurosci Biobehav Rev.* 2018;90:400-10.
2. Shirer WR, Ryali S, Rykhlevskaia E, Menon V, Greicius MD. Decoding subject-driven cognitive states with whole-brain connectivity patterns. *Cereb Cortex.* 2012;22(1):158-65.
3. Eickhoff SB, Laird AR, Fox PT, Bzdok D, Hensel L. Functional Segregation of the Human Dorsomedial Prefrontal Cortex. *Cereb Cortex.* 2016;26(1):304-21.
4. Eickhoff SB, Bzdok D, Laird AR, Kurth F, Fox PT. Activation likelihood estimation meta-analysis revisited. *NeuroImage.* 2012;59(3):2349-61.
5. Eickhoff SB, Laird AR, Grefkes C, Wang LE, Zilles K, Fox PT. Coordinate-based activation likelihood estimation meta-analysis of neuroimaging data: a random-effects approach based on empirical estimates of spatial uncertainty. *Hum Brain Mapp.* 2009;30(9):2907-26.
6. Turkeltaub PE, Eickhoff SB, Laird AR, Fox M, Wiener M, Fox P. Minimizing within-experiment and within-group effects in Activation Likelihood Estimation meta-analyses. *Hum Brain Mapp.* 2012;33(1):1-13.
7. Eickhoff SB, Nichols TE, Laird AR, Hoffstaedter F, Amunts K, Fox PT, et al. Behavior, sensitivity, and power of activation likelihood estimation characterized by massive empirical simulation. *NeuroImage.* 2016;137:70-85.
8. Müller VI, Cieslik EC, Laird AR, Fox PT, Radua J, Mataix-Cols D, Tench CR, Yarkoni T, Nichols TE, Turkeltaub PE, Wager TD, Eickhoff SB. Ten simple rules for neuroimaging meta-analysis. *Neurosci Biobehav Rev.* 2018;84:151-161.
9. McTeague LM, Huemer J, Carreon DM, Jiang Y, Eickhoff SB, Etkin A. Identification of Common Neural Circuit Disruptions in Cognitive Control Across Psychiatric Disorders. *The American journal of psychiatry.* 2017;174(7):676-85.
